# Supplementary material for: Alkylation and silylation of α-fluorobenzyl anion intermediates
Source: Royal Society of Chemistry journal article supplement (doi:10.1039/d3ob01586f), 2023-01-01
Supplement: d3ob01586f1.pdf [file d3ob01586f1.pdf]

## Supporting Information

for

# Alkylation and silylation of $\alpha$ -fluorobenzyl anion intermediates

Taku Kitahara <sup>a</sup>, Yuta Tagami<sup>a</sup>, Yuto Haga, Tsuyuka Sugiishi<sup>a</sup>, Santos Fustero<sup>b</sup>, and Hideki Amii<sup>a,\*</sup>

Address: <sup>†</sup> Division of Molecular Science, Graduate School of Science and Technology, 1-5-1, Tenjin-cho, Kiryu, Gunma 376-8515, Japan

<sup>‡</sup>Departamento de Química Orgánica, Facultad de Farmacia, Universitat de València, Vicente Andrés Estelles s/n, C.P.: 46100 Burjassot, Valencia, Spain

Email: Hideki Amii - [amii@gunma-u.ac.jp](mailto:amii@gunma-u.ac.jp)

\* Corresponding author

### Table of Contents

|                            |        |
|----------------------------|--------|
| 1. NMR Spectra of products | S2–S22 |
| 2. Appendix                | S23    |

<sup>1</sup>H NMR spectrum of 4-(1-Fluoroethyl)biphenyl (2a)

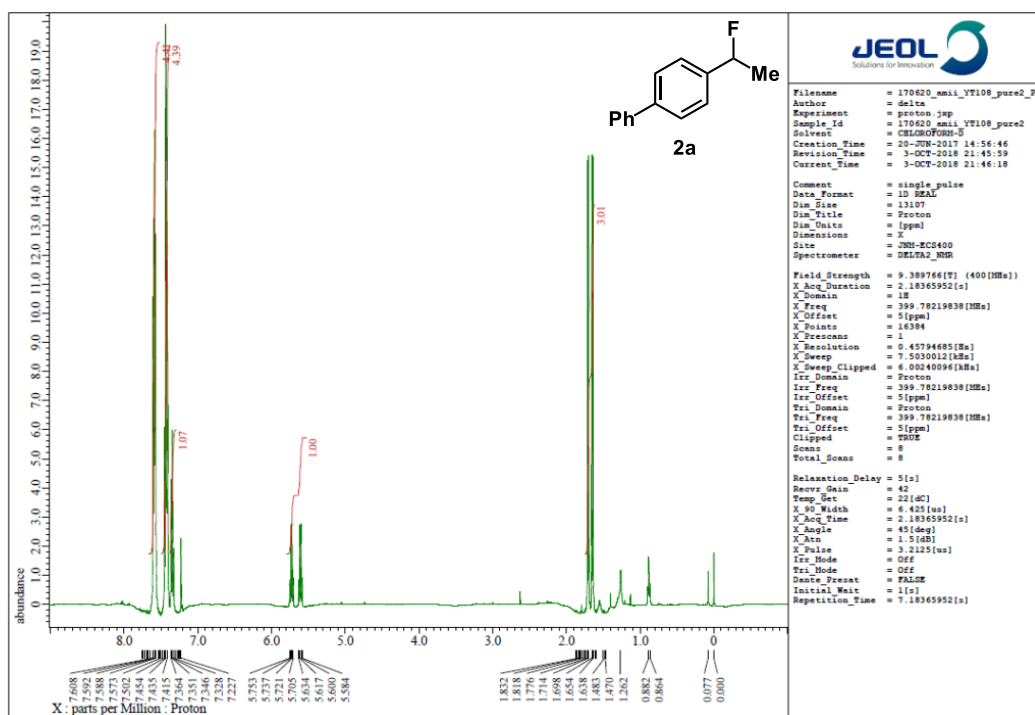

<sup>19</sup>F NMR spectrum of 4-(1-Fluoroethyl)biphenyl (2a)

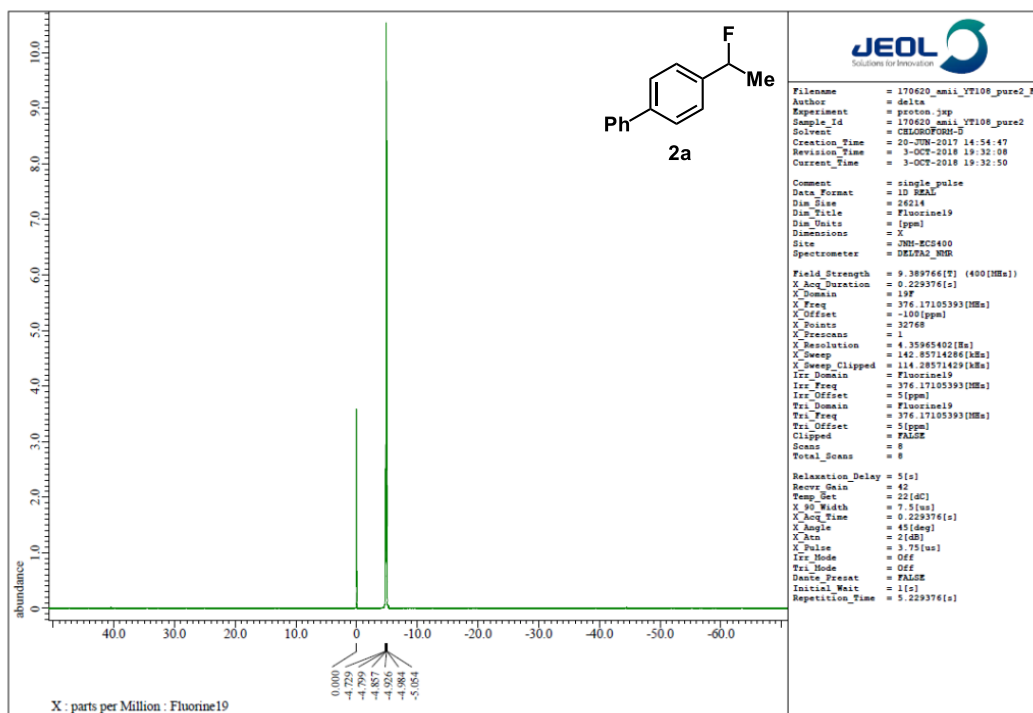

<sup>13</sup>C NMR spectrum of 4-(1-Fluoroethyl)biphenyl (2a)

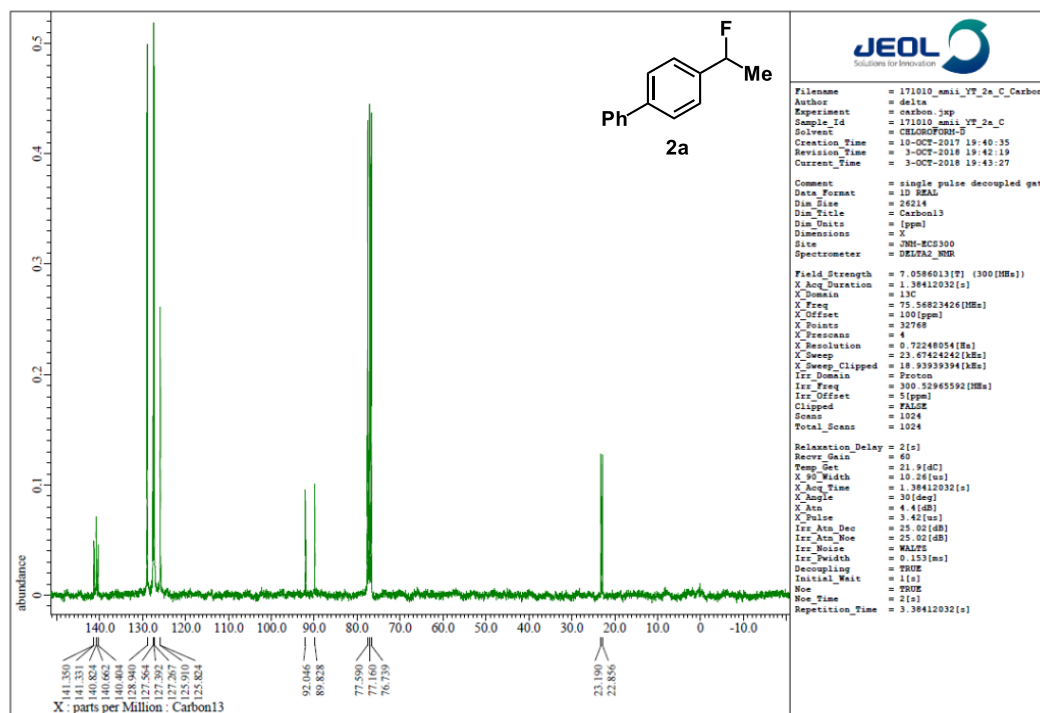

<sup>1</sup>H NMR spectrum of 4-(1-Fluoropropyl)biphenyl (2b)

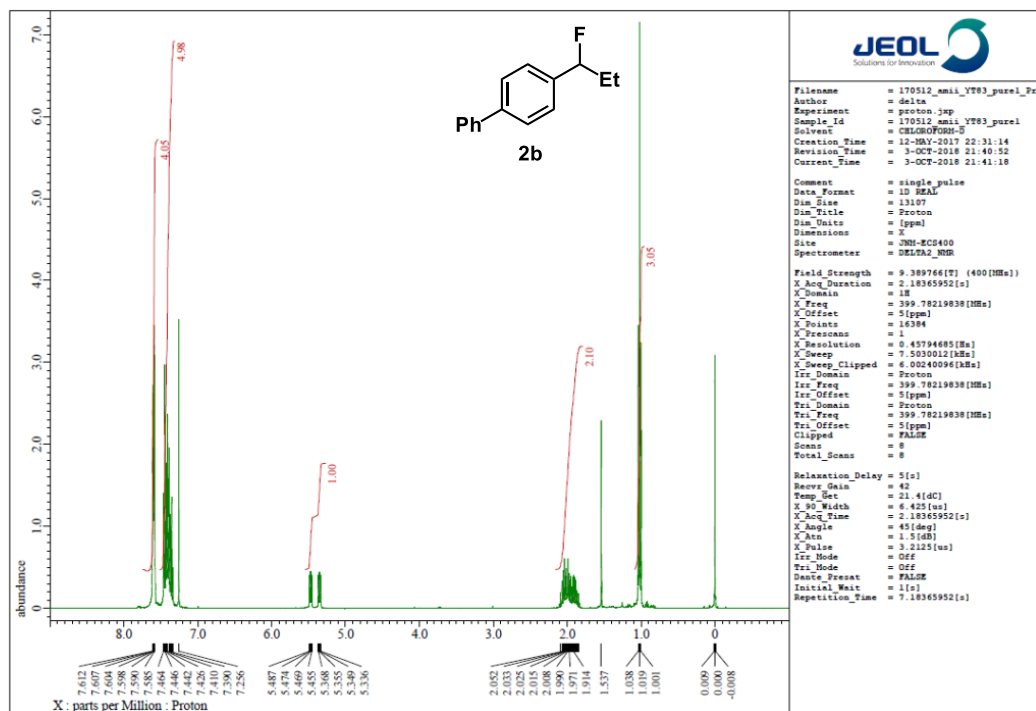

<sup>19</sup>F NMR spectrum of 4-(1-Fluoropropyl)biphenyl (**2b**)

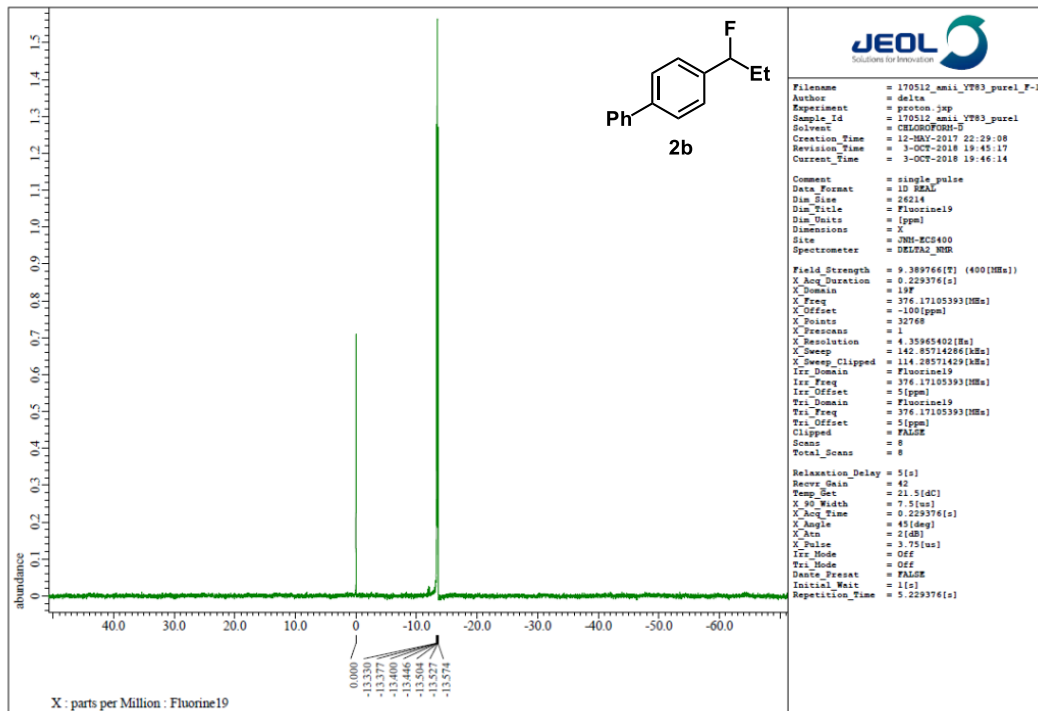

<sup>13</sup>C NMR spectrum of 4-(1-Fluoropropyl)biphenyl (**2b**)

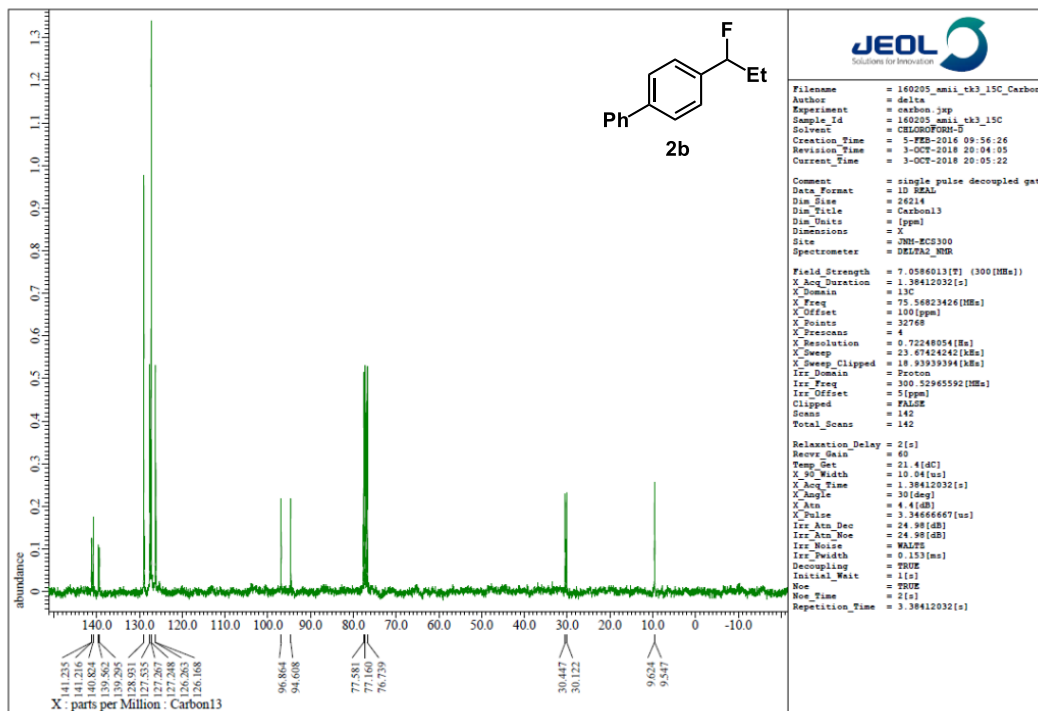

<sup>1</sup>H NMR spectrum of 4-(1-Fluoropentyl)biphenyl (**2c**)

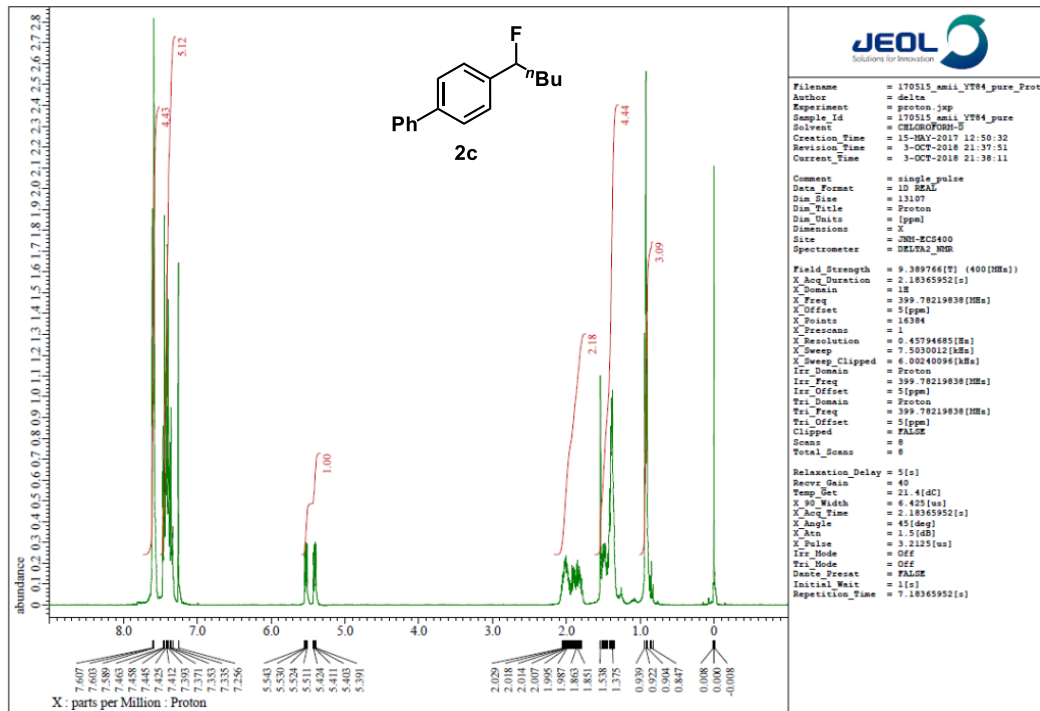

<sup>19</sup>F NMR spectrum of 4-(1-Fluoropentyl)biphenyl (**2c**)

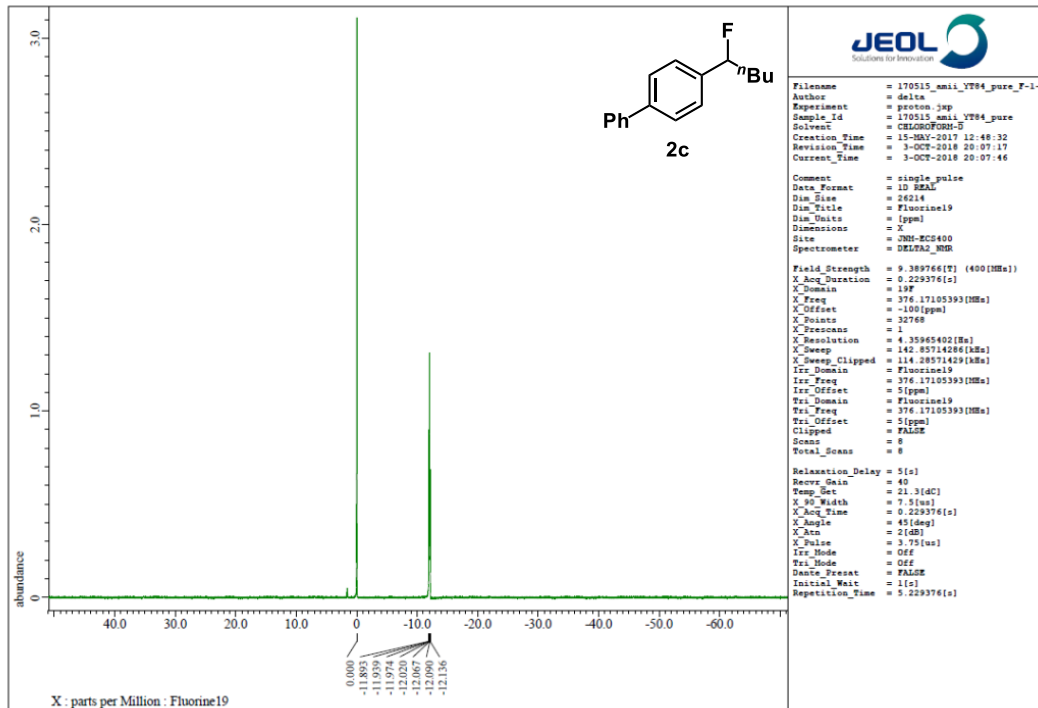

<sup>13</sup>C NMR spectrum of 4-(1-Fluoropentyl)biphenyl (**2c**)

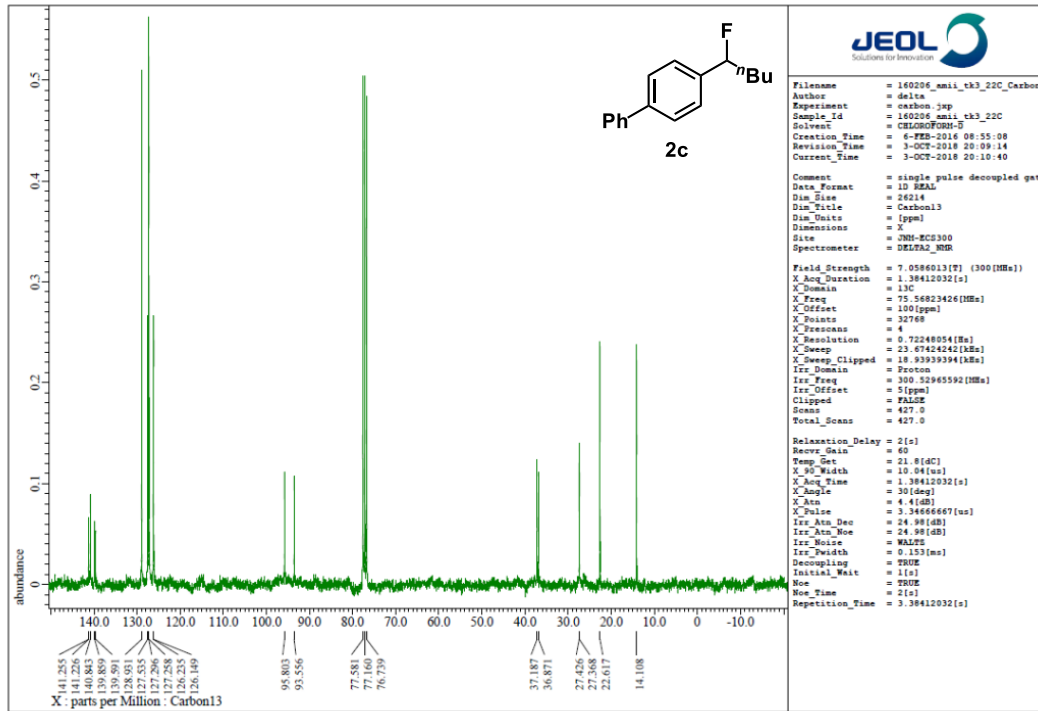

<sup>1</sup>H NMR spectrum of 4-(1-Fluoro-2-methylpropyl)biphenyl (**2d**)

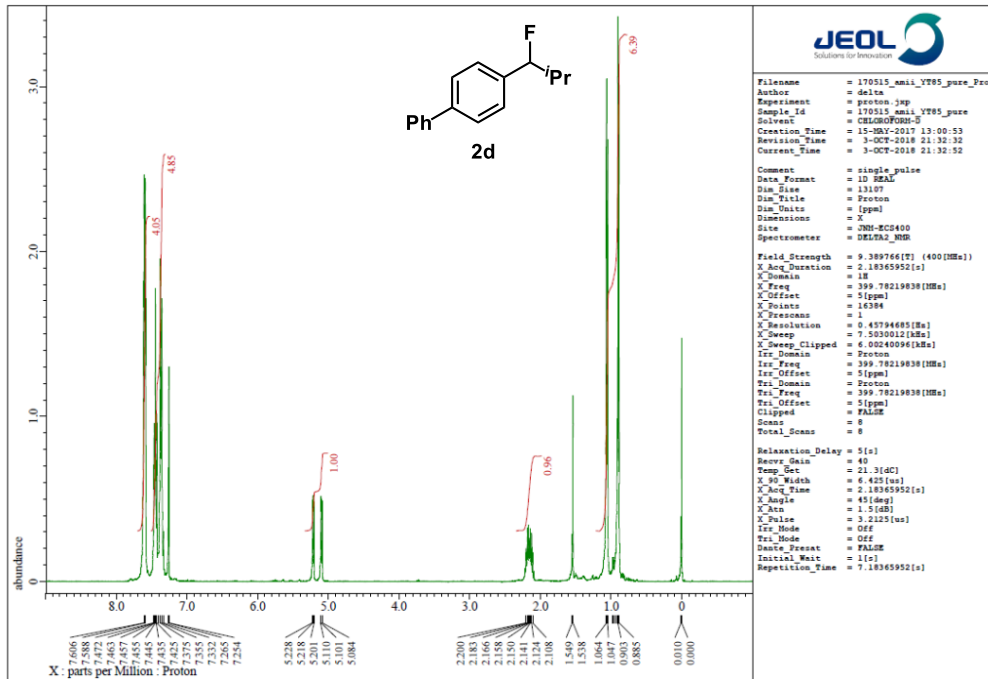

<sup>19</sup>F NMR spectrum of 4-(1-Fluoro-2-methylpropyl)biphenyl (**2d**)

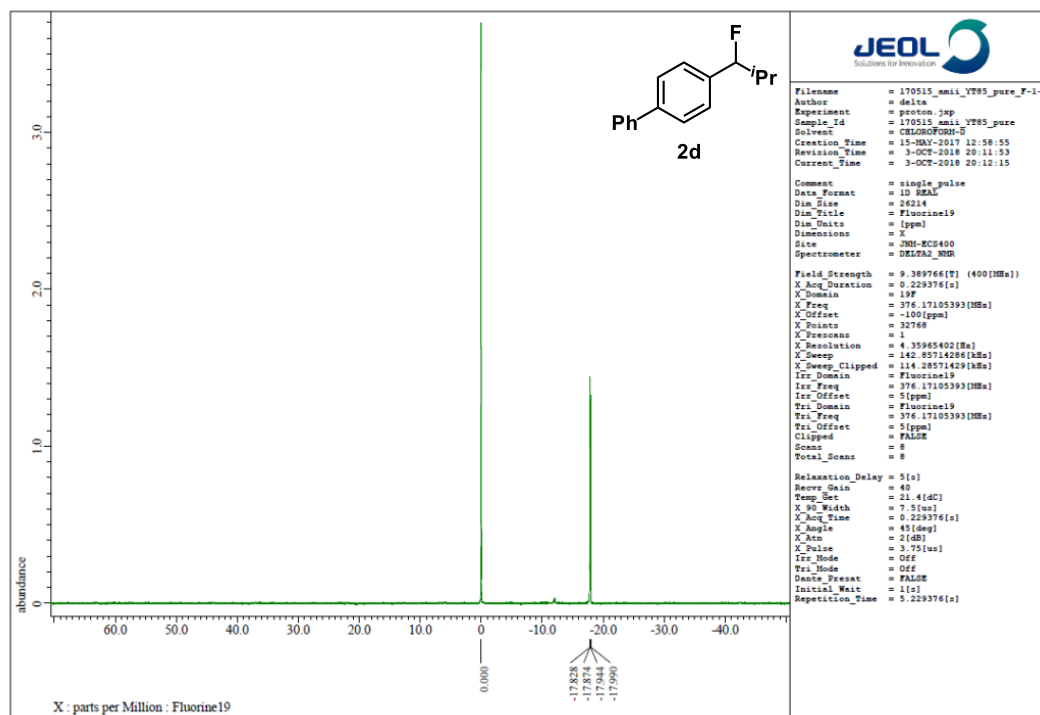

<sup>13</sup>C NMR spectrum of 4-(1-Fluoro-2-methylpropyl)biphenyl (**2d**)

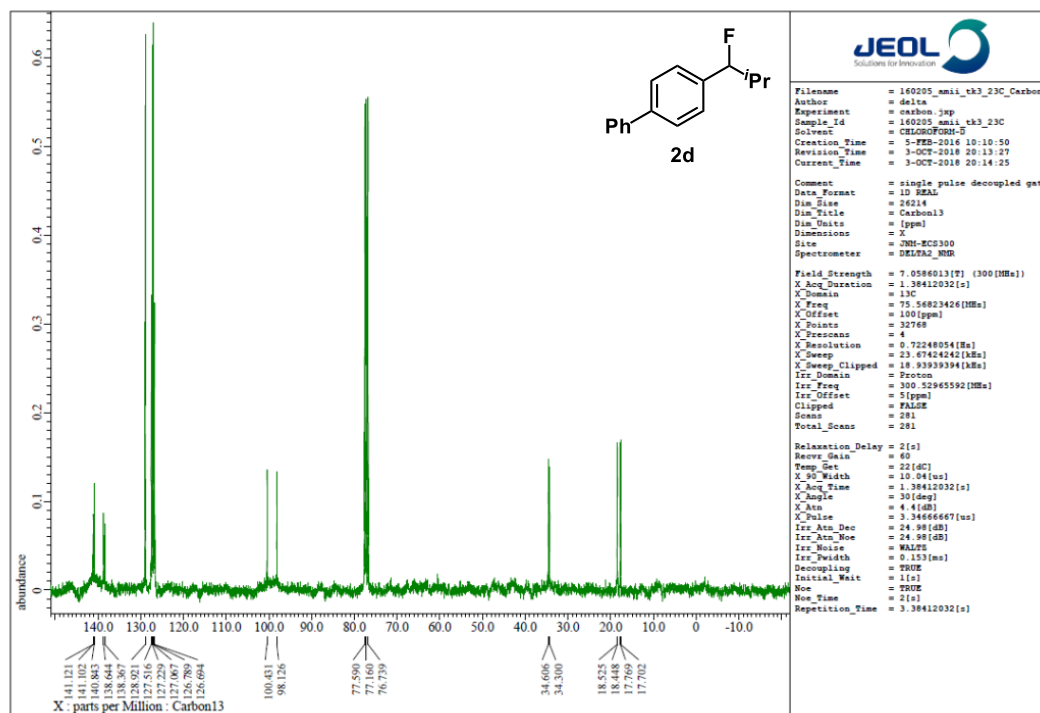

<sup>1</sup>H NMR spectrum of 1-Chloro-4-(1-fluoroethyl)benzene (**2e**)

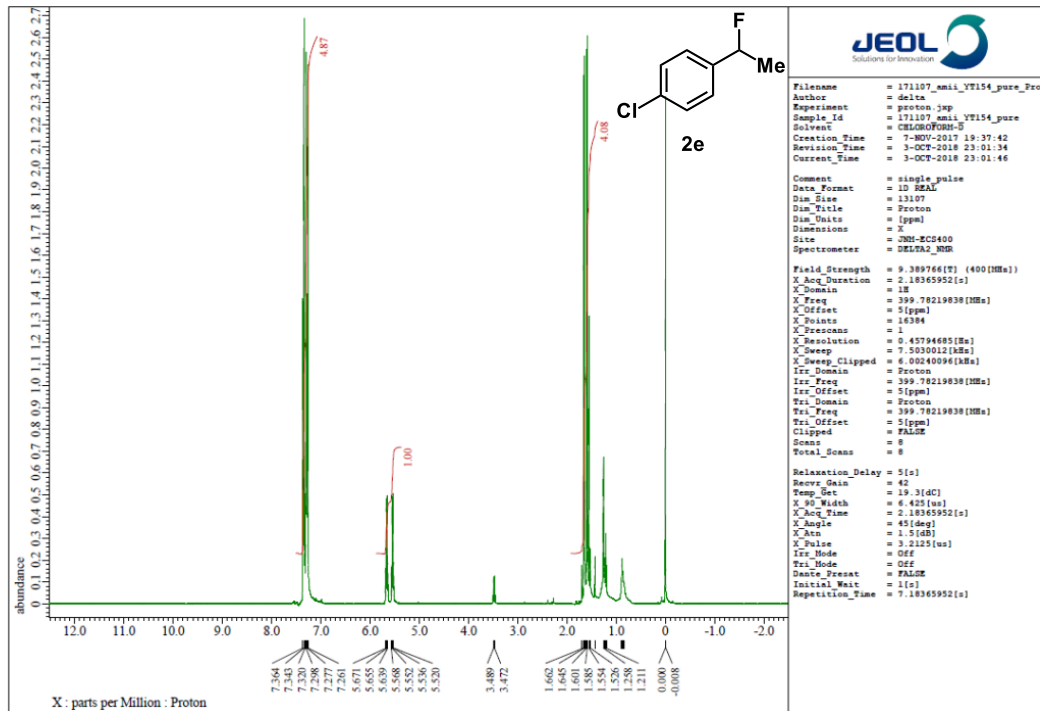

<sup>19</sup>F NMR spectrum of 1-Chloro-4-(1-fluoroethyl)benzene (**2e**)

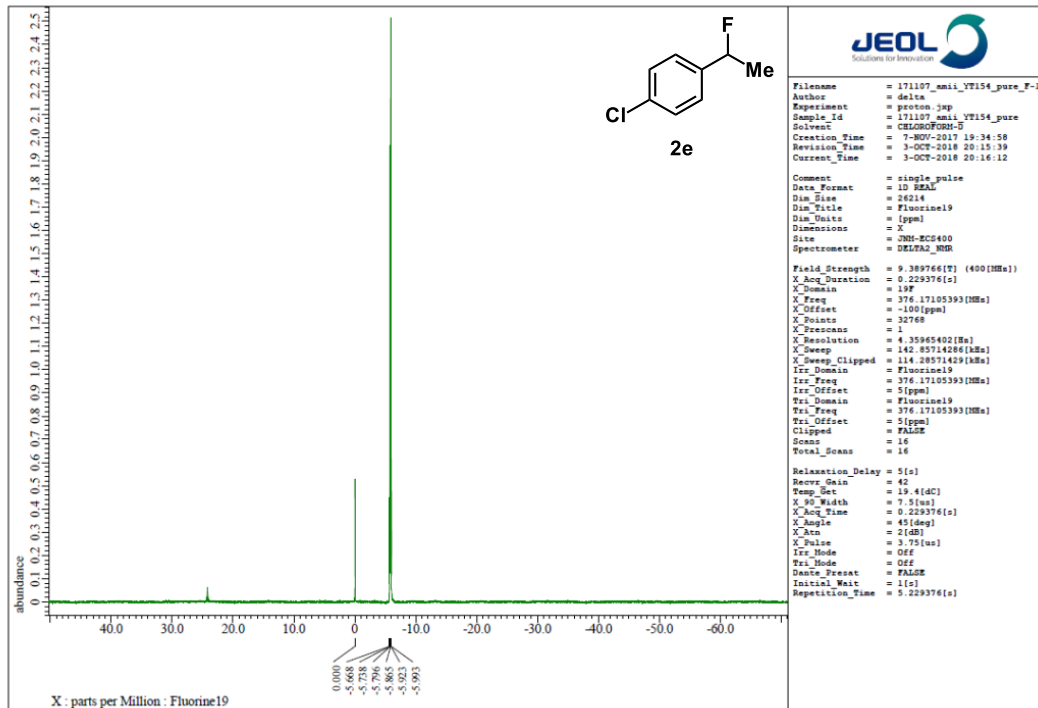



<sup>13</sup>C NMR spectrum of 1-Chloro-4-(1-fluoroethyl)benzene (**2e**)

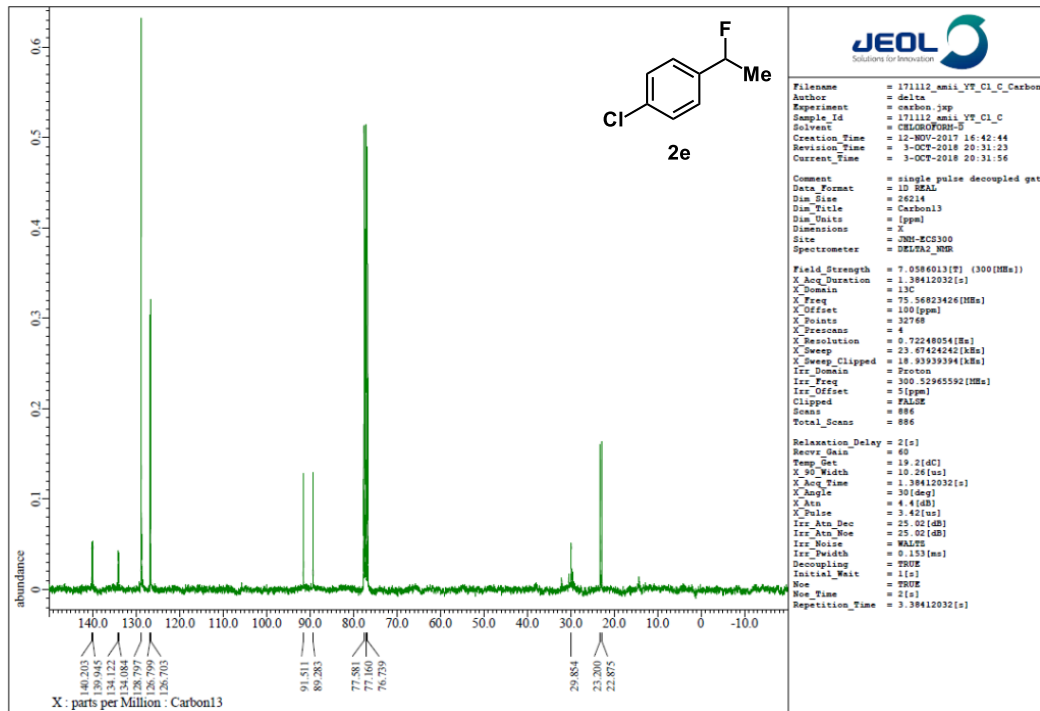

<sup>1</sup>H NMR spectrum of 1-Bromo-4-(1-fluoroethyl)benzene (**2f**)

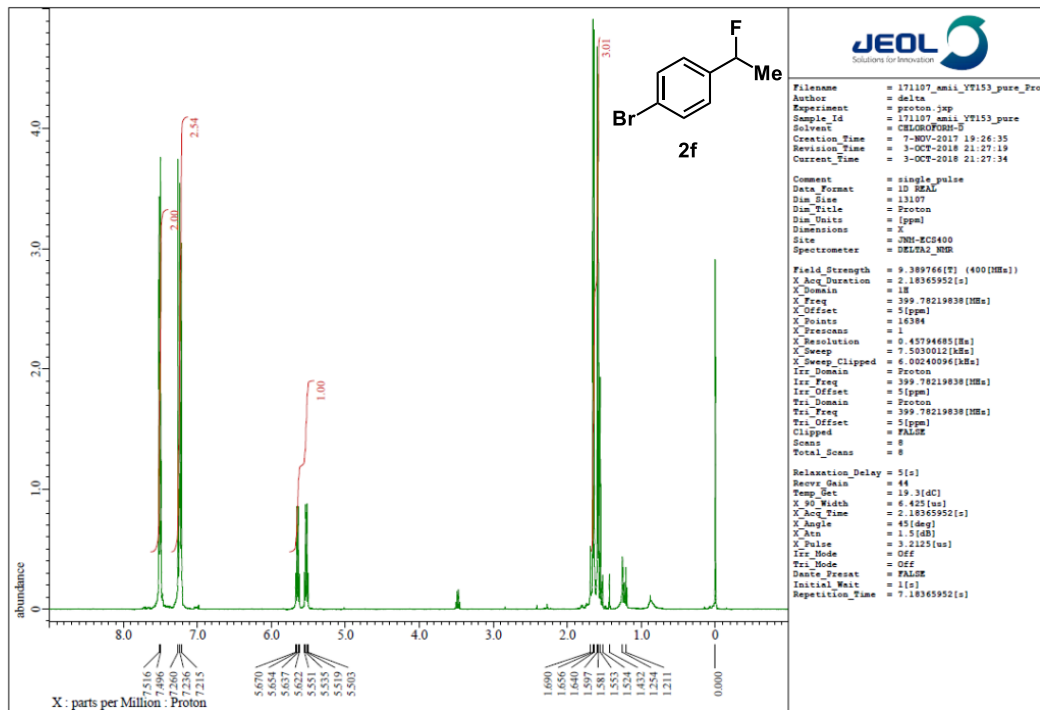

<sup>19</sup>F NMR spectrum of 1-Bromo-4-(1-fluoroethyl)benzene (**2f**)

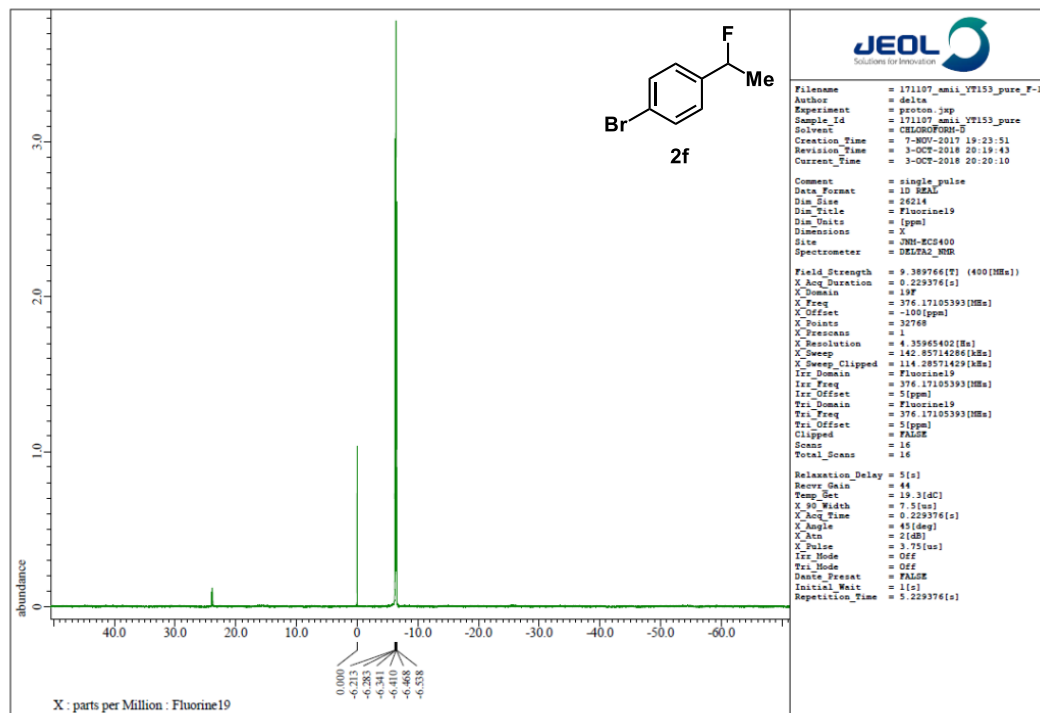

<sup>13</sup>C NMR spectrum of 1-Bromo-4-(1-fluoroethyl)benzene (**2f**)

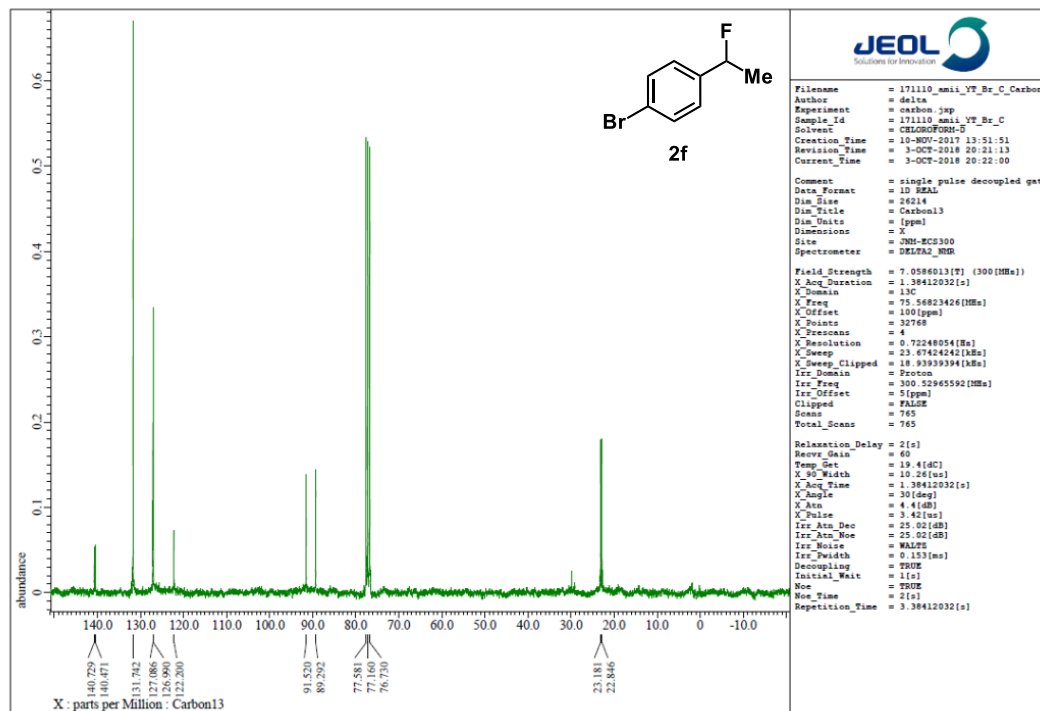

<sup>1</sup>H NMR spectrum of 2-(4-biphenyl)-2-fluoro-1,1-diphenylethan-1-ol (**2h**)

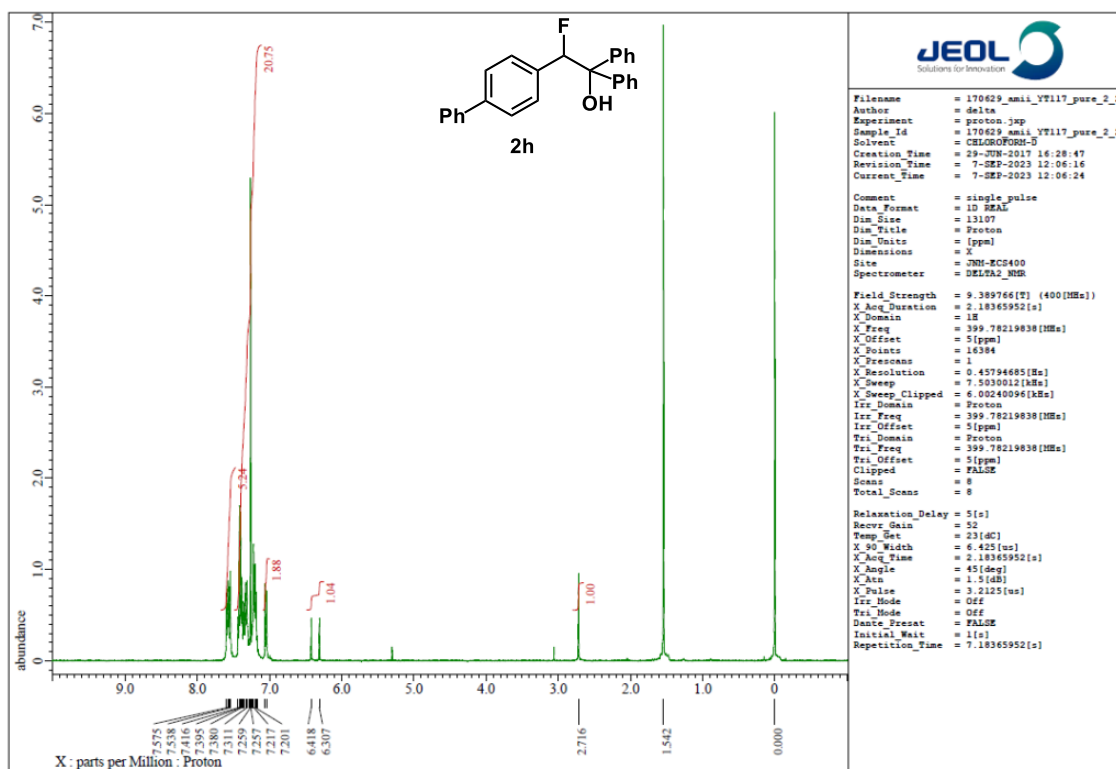

<sup>19</sup>F NMR spectrum of 2-(4-biphenyl)-2-fluoro-1,1-diphenylethan-1-ol (**2h**)

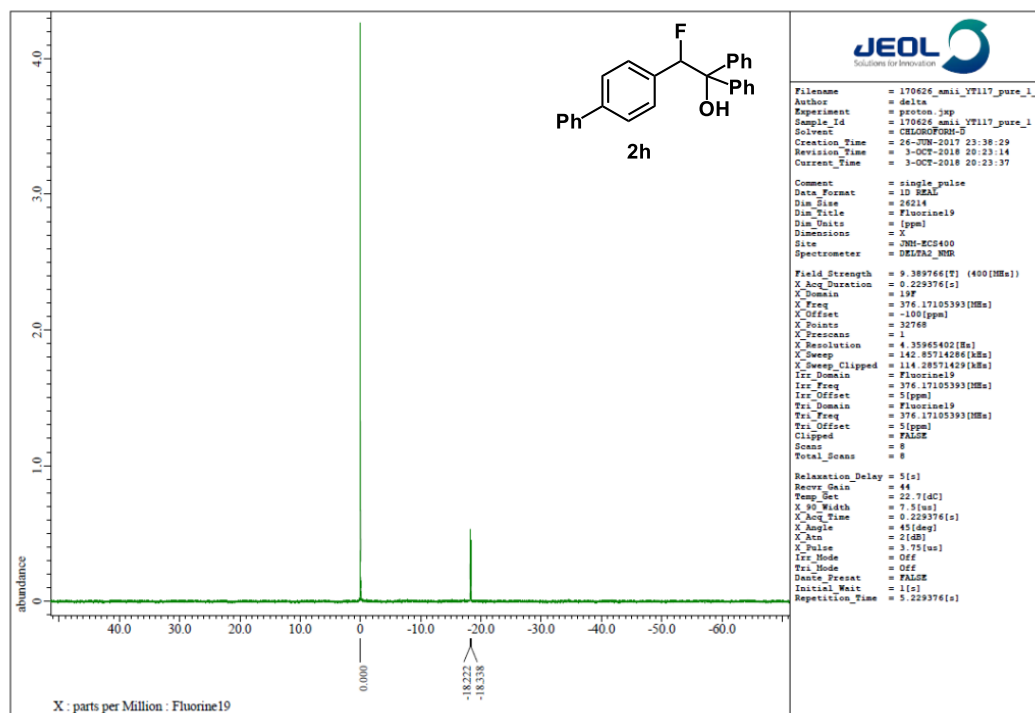

<sup>13</sup>C NMR spectrum of 2-(4-biphenyl)-2-fluoro-1,1-diphenylethan-1-ol (**2h**)

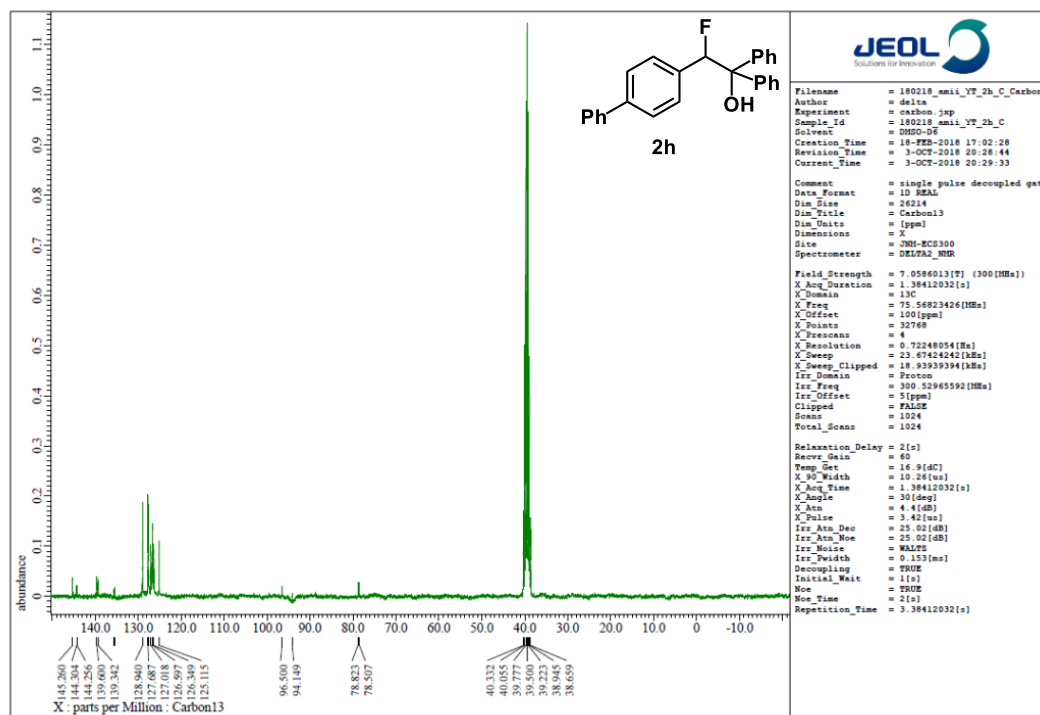

<sup>1</sup>H NMR spectrum of 4-(1-Fluoro-1-trimethylsilylmethyl)biphenyl (**3a**)

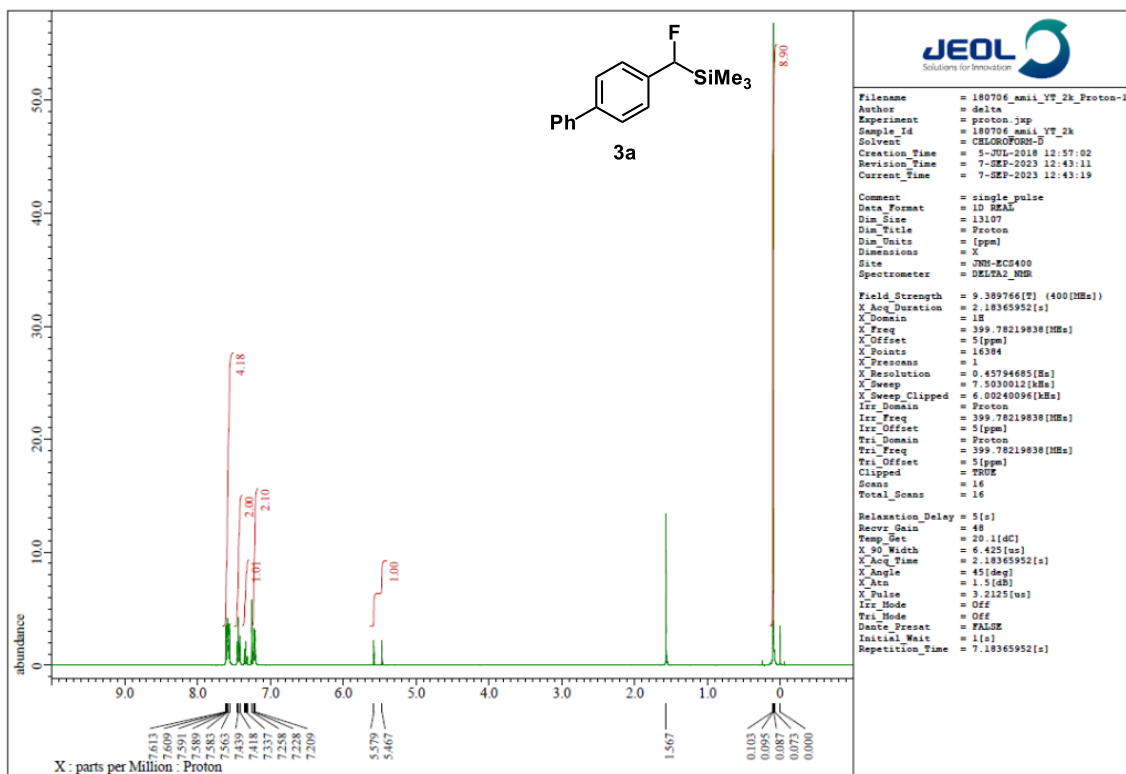

<sup>19</sup>F NMR spectrum of 4-(1-Fluoro-1-trimethylsilylmethyl)biphenyl (**3a**)

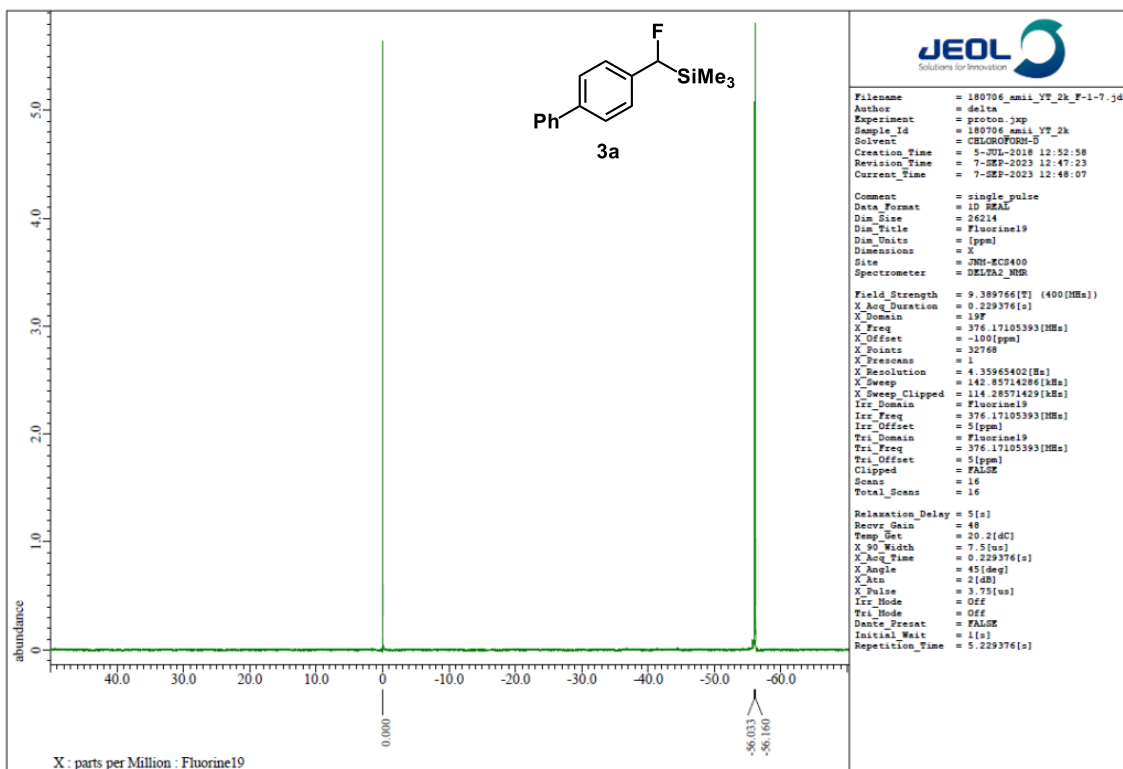

<sup>13</sup>C NMR spectrum of 4-(1-Fluoro-1-trimethylsilylmethyl)biphenyl (**3a**)

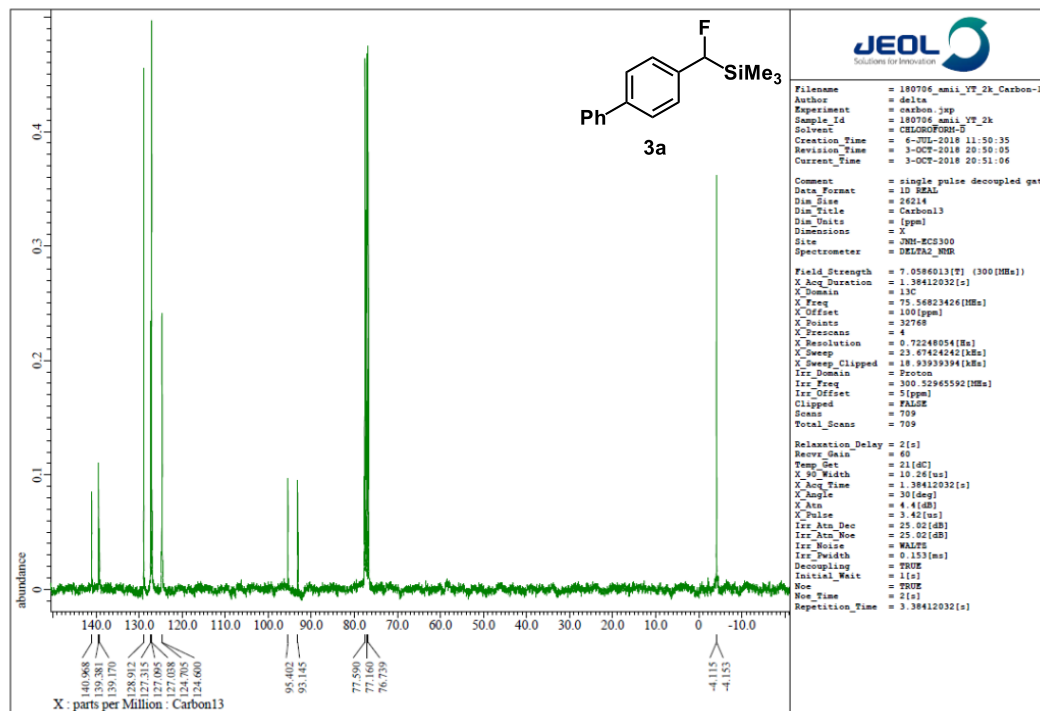

<sup>1</sup>H NMR spectrum of 1-Chloro-3-(1-fluoro-1-trimethylsilylmethyl)benzene (**3b**)

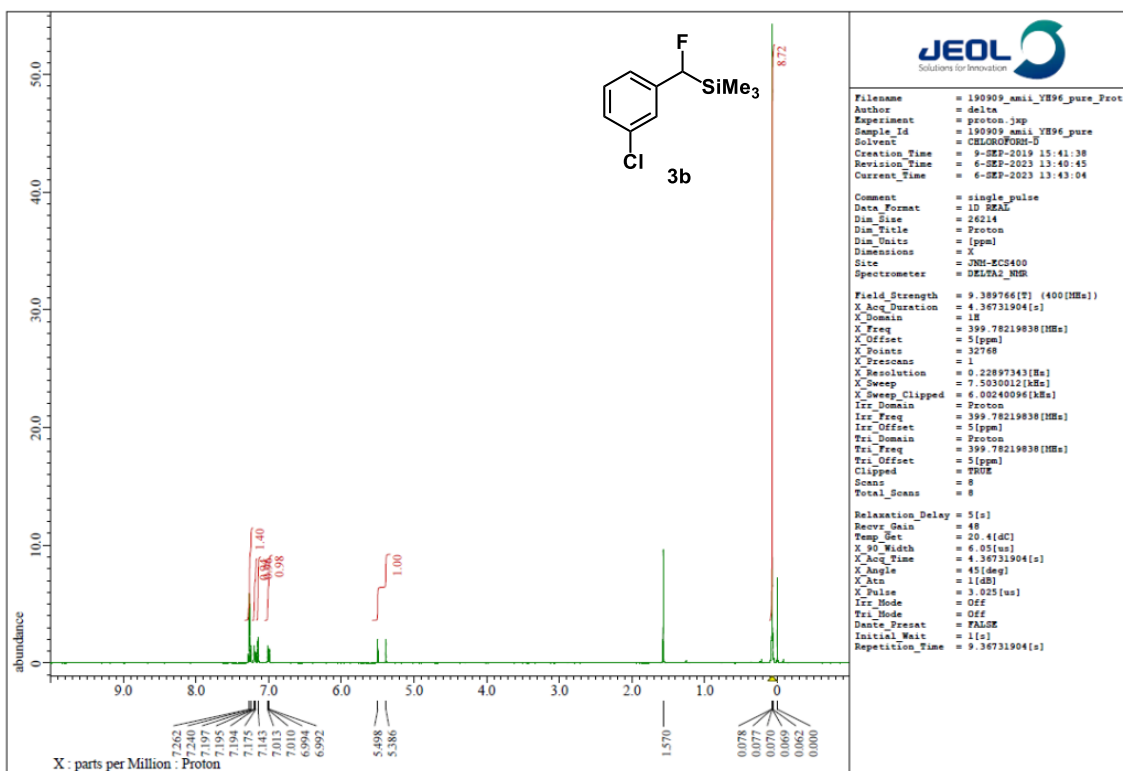

<sup>19</sup>F NMR spectrum of 1-Chloro-3-(1-fluoro-1-trimethylsilylmethyl)benzene (**3b**)

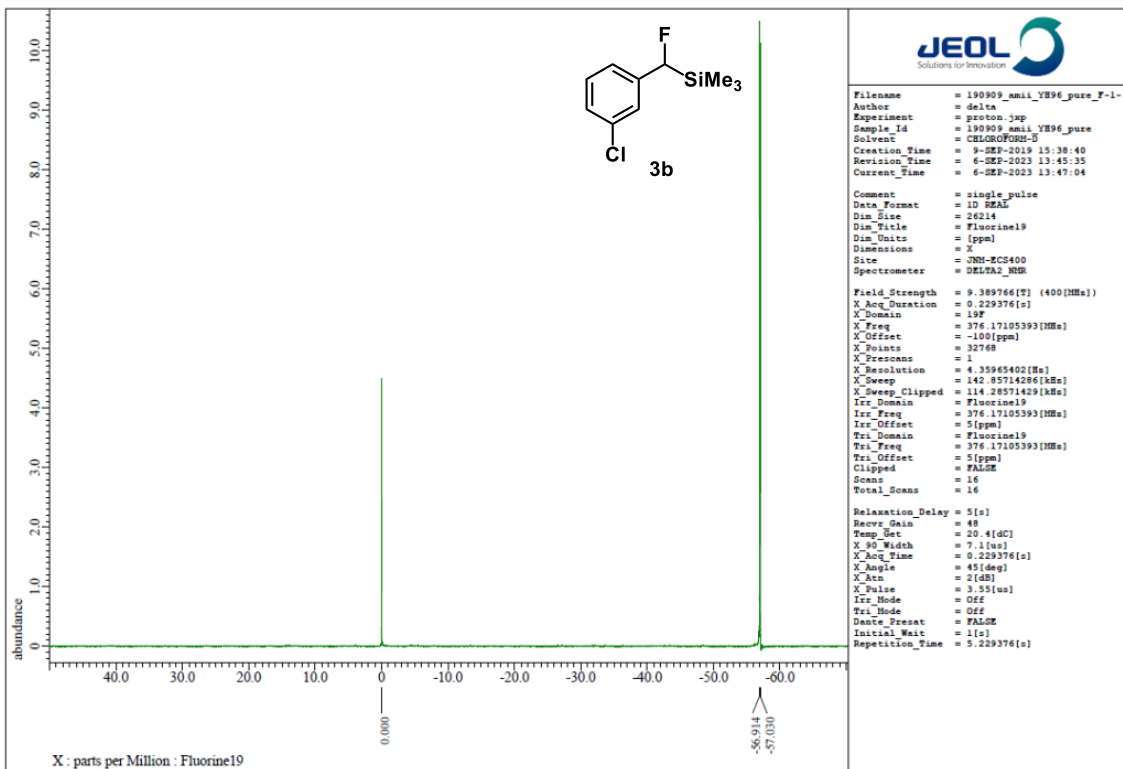

<sup>13</sup>C NMR spectrum of 1-Chloro-3-(1-fluoro-1-trimethylsilylmethyl)benzene (**3b**)

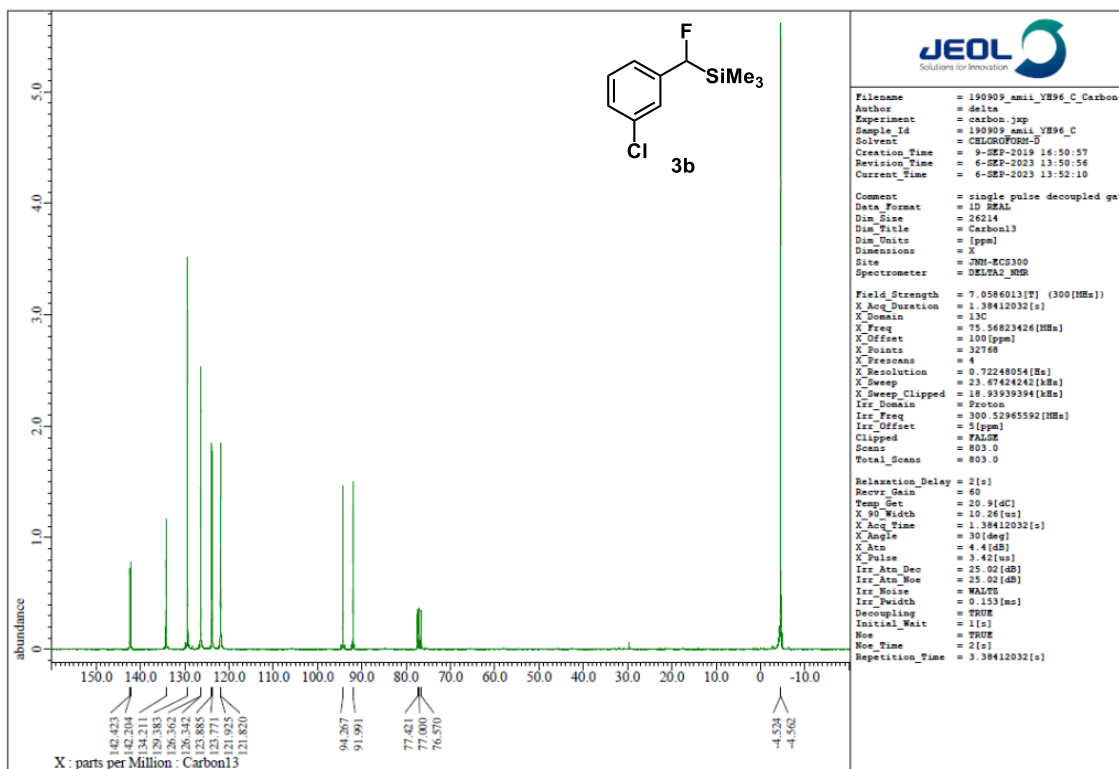

<sup>1</sup>H NMR spectrum of 1-(1-Fluoro-1-trimethylsilylmethyl)-4-tertiarybutylbenzene (**3c**)

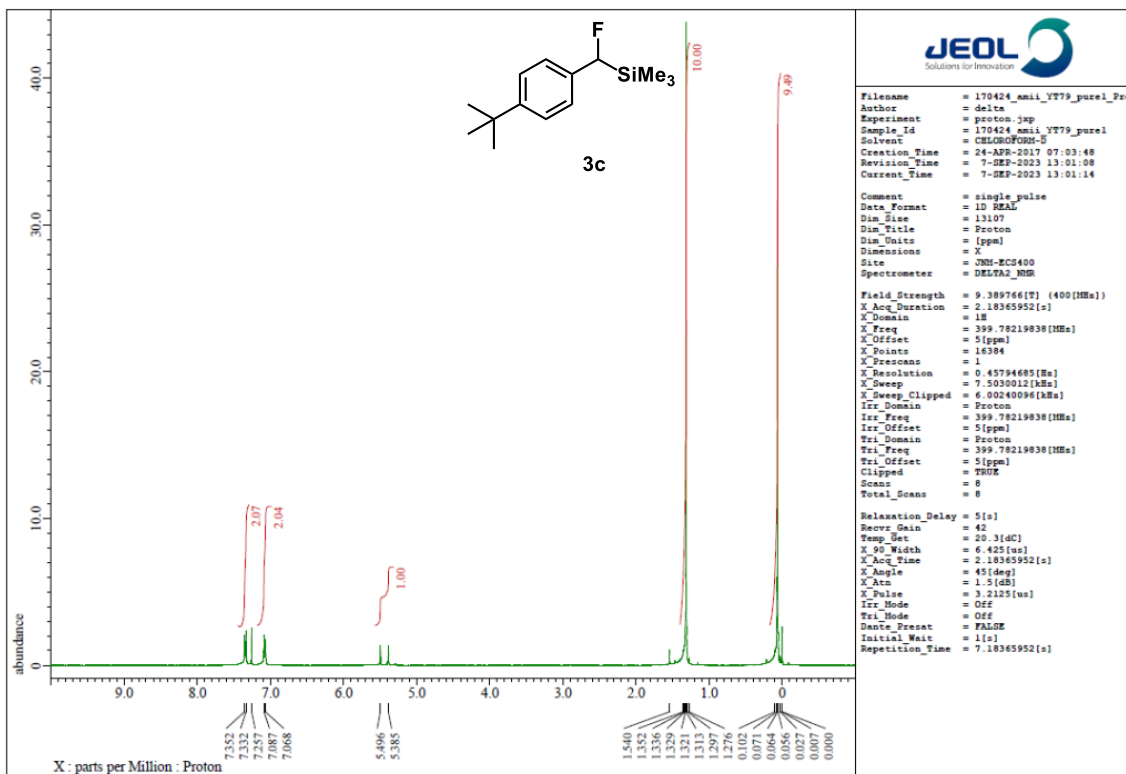

<sup>19</sup>F NMR spectrum of 1-(1-Fluoro-1-trimethylsilylmethyl)-4-tertiarybutylbenzene (**3c**)

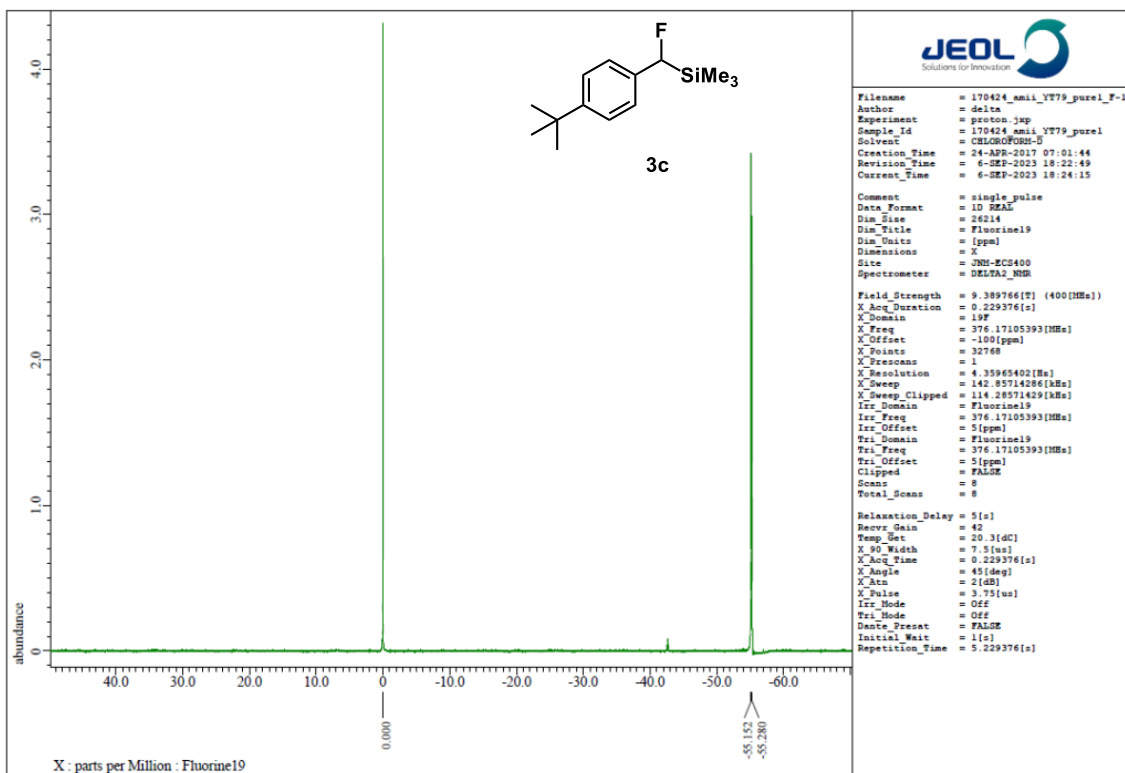

<sup>13</sup>C NMR spectrum of 1-(1-Fluoro-1-trimethylsilylmethyl)-4-tertiarybutylbenzene (**3c**)

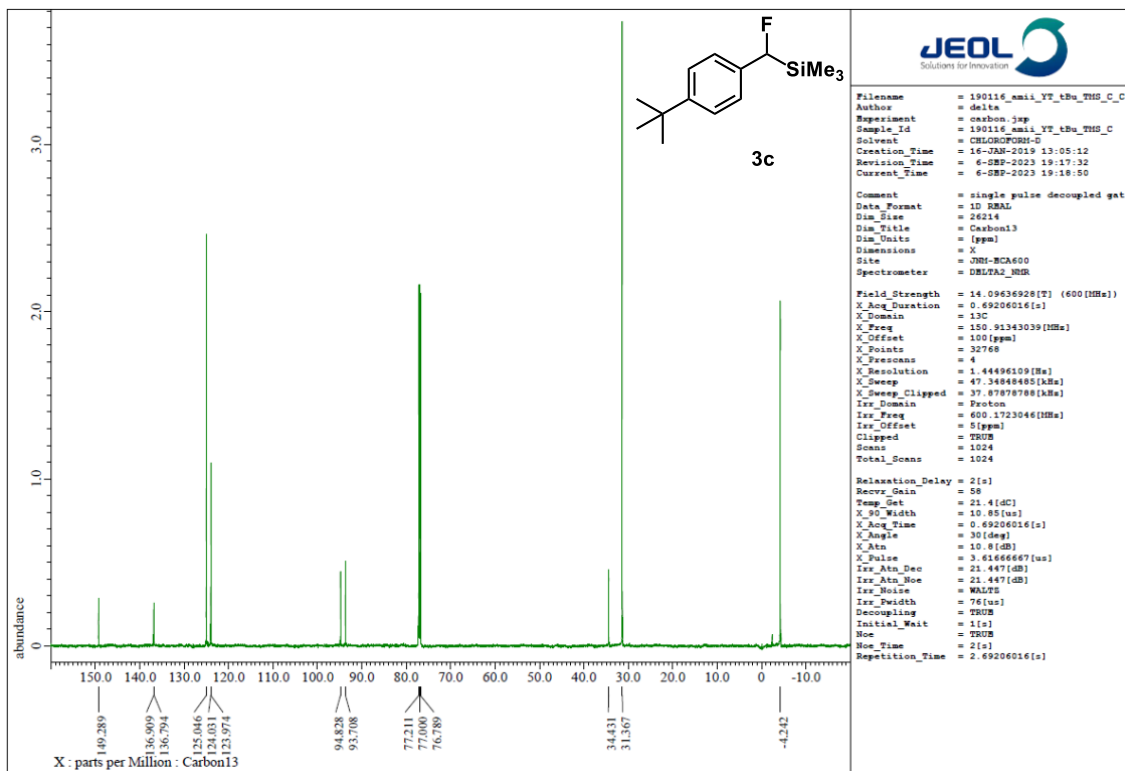



<sup>1</sup>H NMR spectrum of 2-(4-Biphenyl)-2-fluoro-1-phenylethanol (4a)

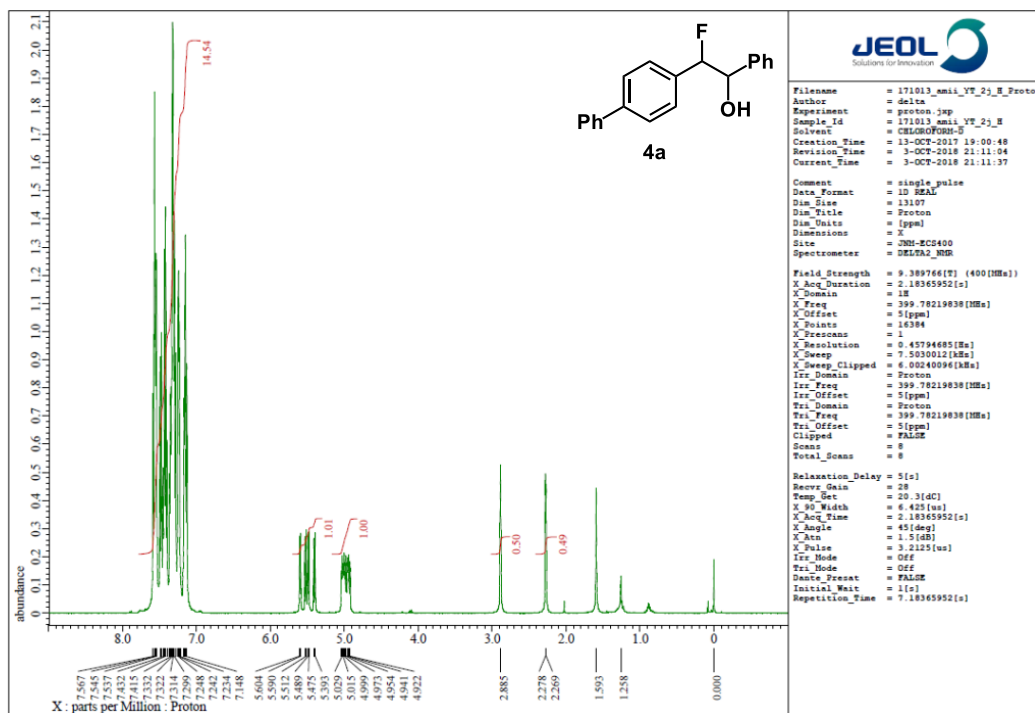

<sup>19</sup>F NMR spectrum of 2-(4-Biphenyl)-2-fluoro-1-phenylethanol (4a)

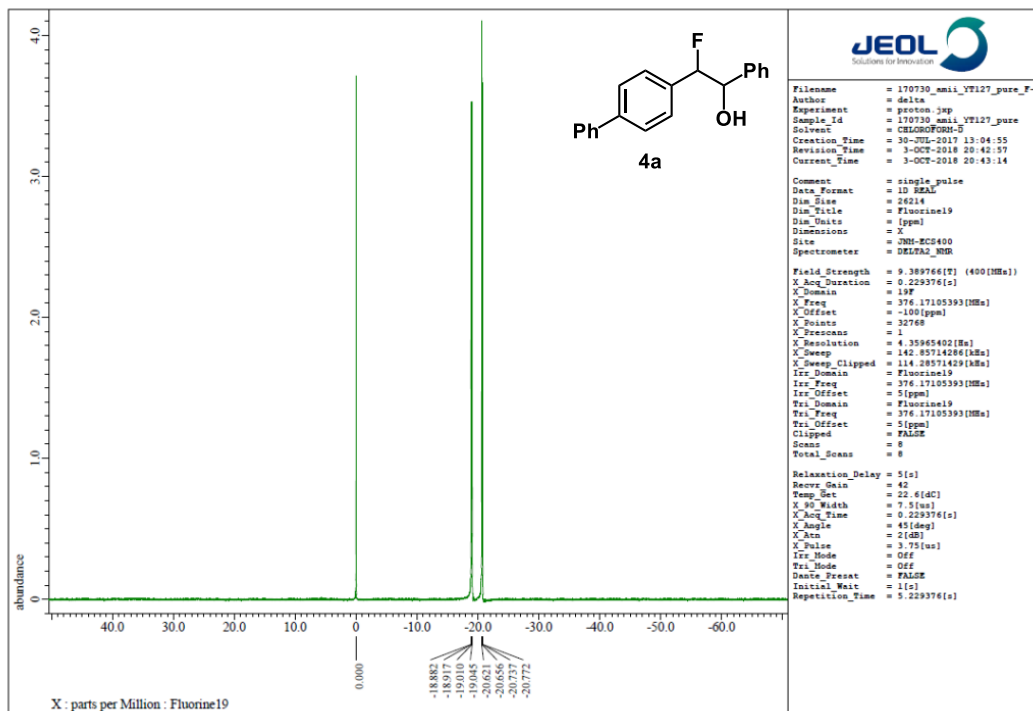

<sup>13</sup>C NMR spectrum of 2-(4-Biphenyl)-2-fluoro-1-phenylethanol (**4a**)

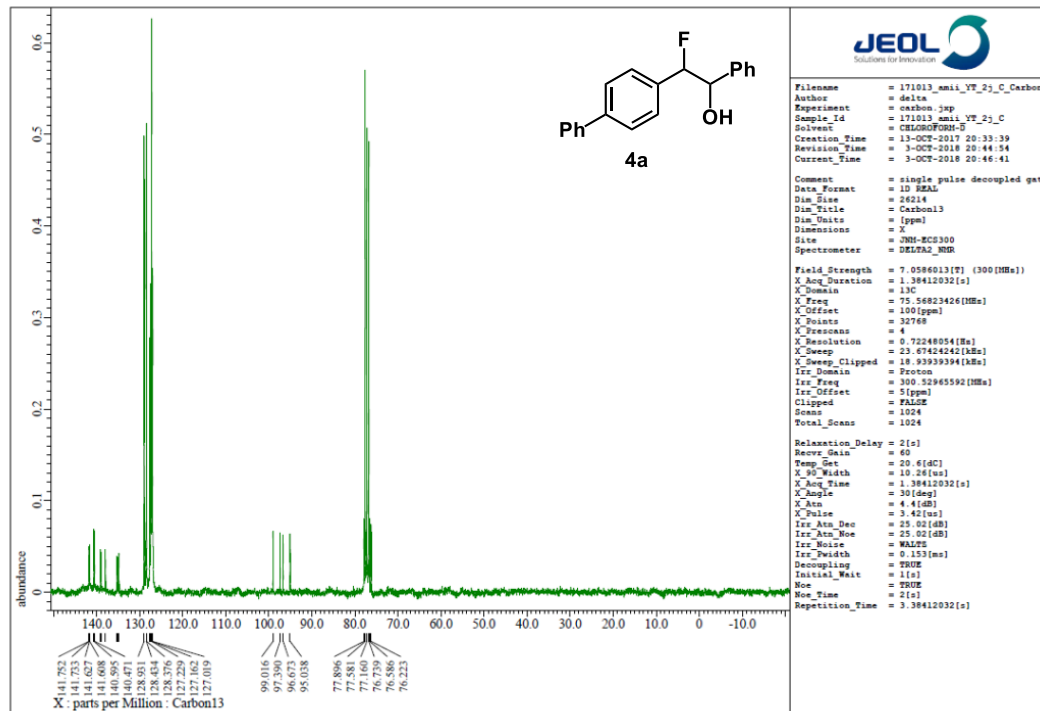

<sup>1</sup>H NMR spectrum of 2-(3-chlorophenyl)-2-fluoro-1-phenylethanol (**4b**)

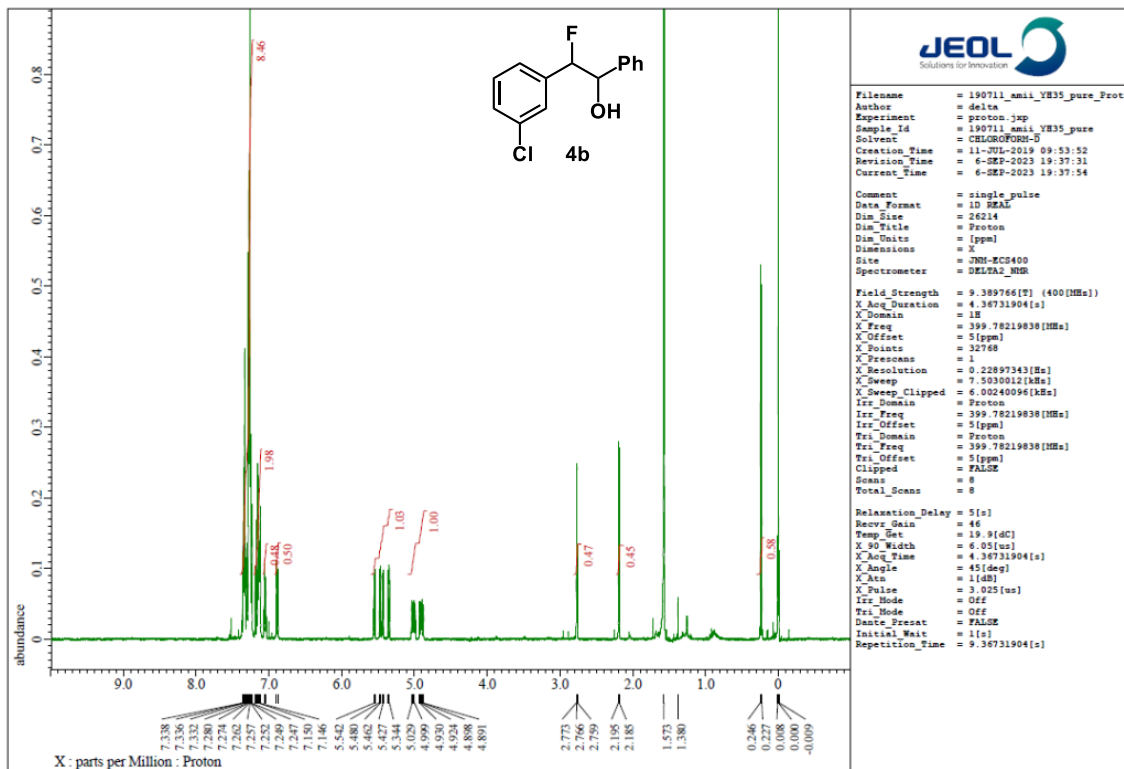

<sup>19</sup>F NMR spectrum of 2-(3-chlorophenyl)-2-fluoro-1-phenylethan-1-ol (4b)

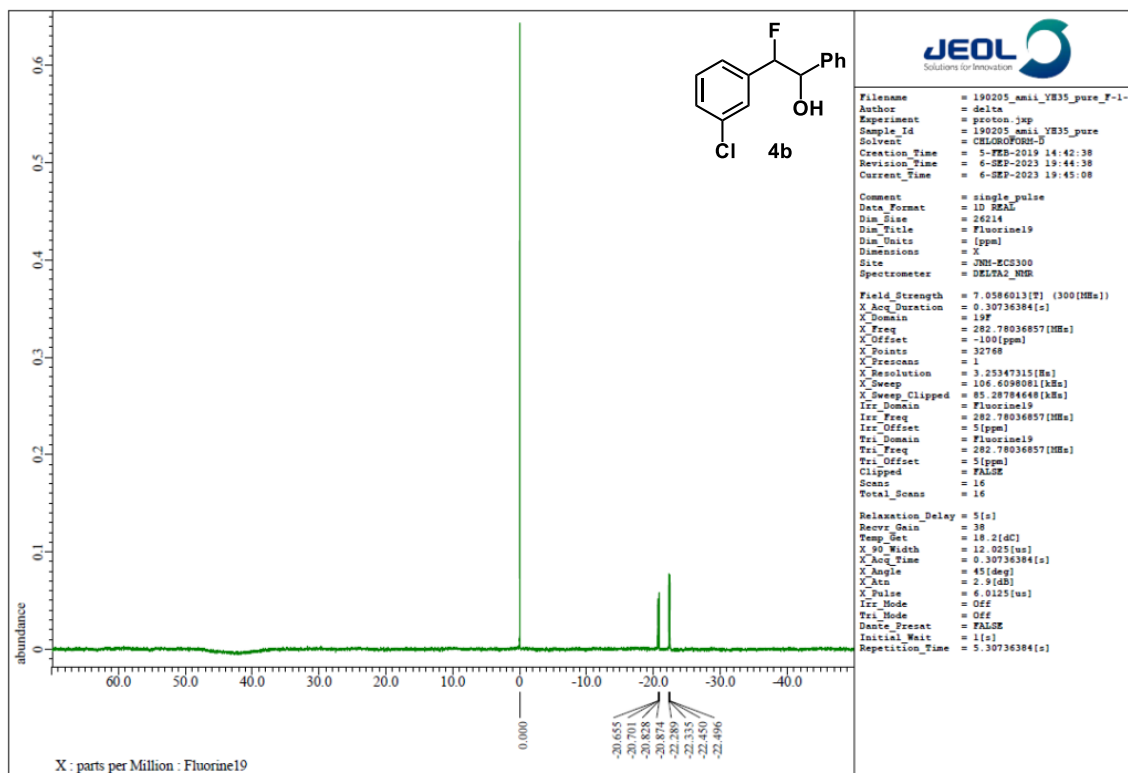

<sup>13</sup>C NMR spectrum of 2-(3-chlorophenyl)-2-fluoro-1-phenylethan-1-ol (4b)

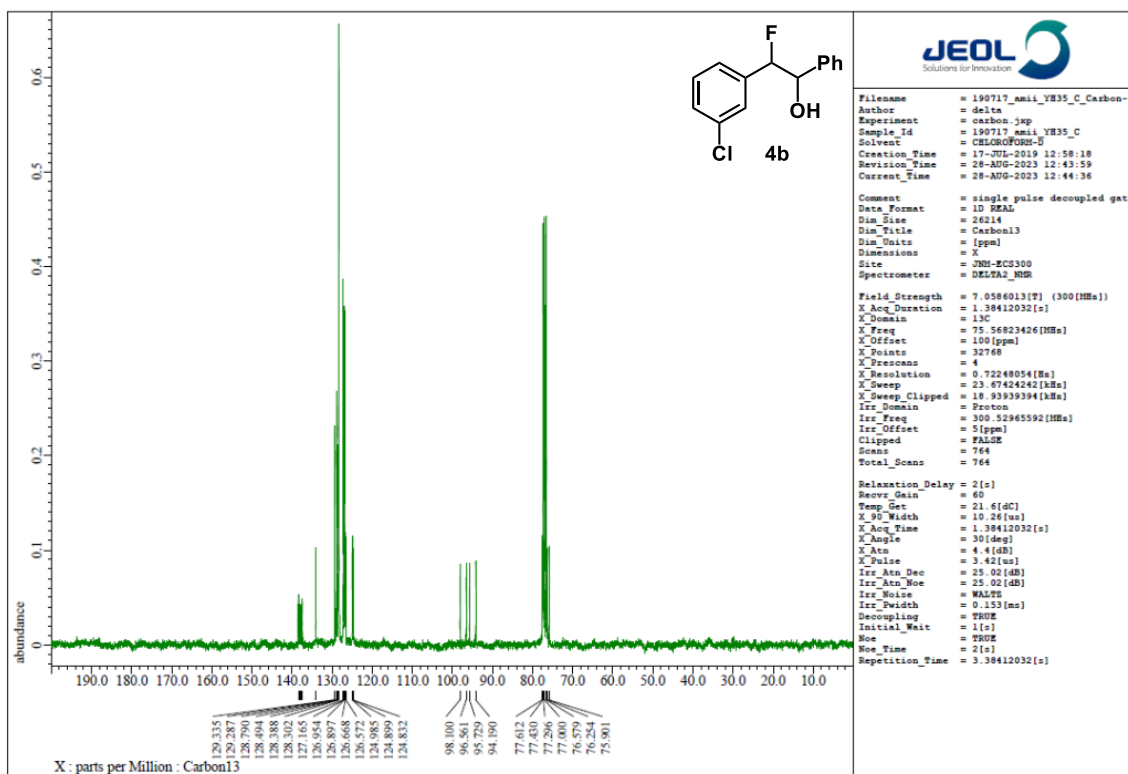

<sup>1</sup>H NMR spectrum of 2-(4-(tert-butyl)phenyl)-2-fluoro-1-phenylethan-1-ol (**4c**)

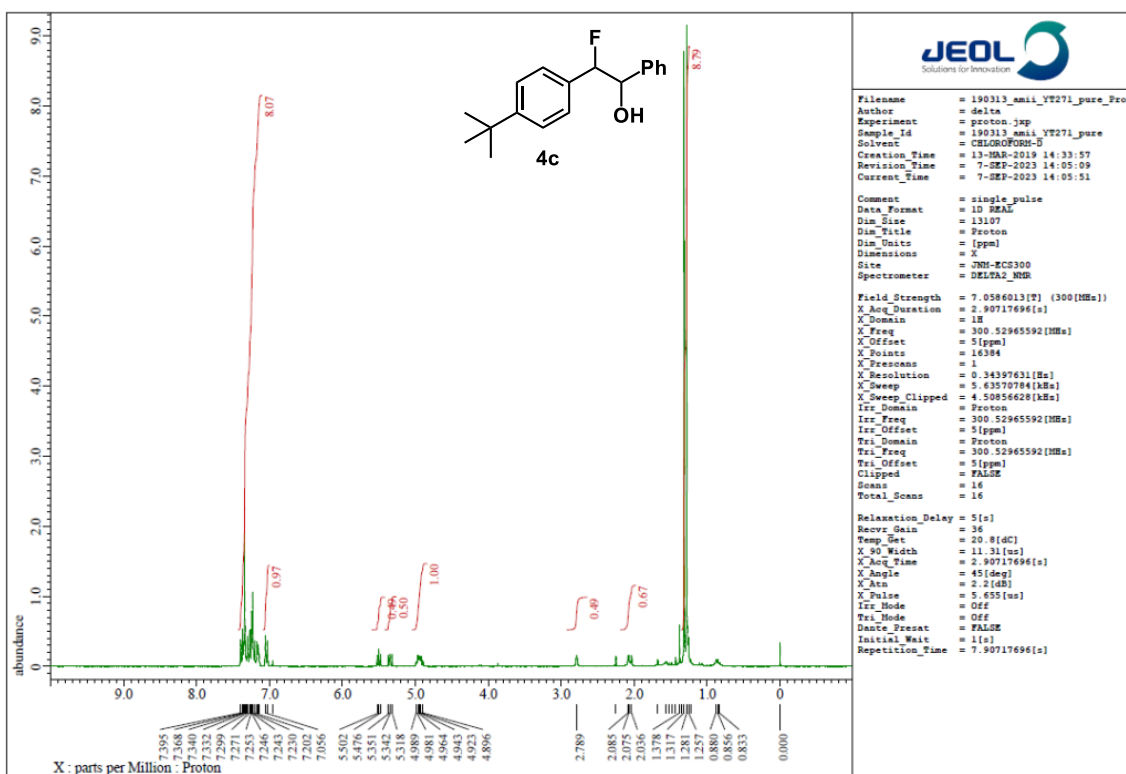

<sup>19</sup>F NMR spectrum of 2-(4-(tert-butyl)phenyl)-2-fluoro-1-phenylethan-1-ol (**4c**)

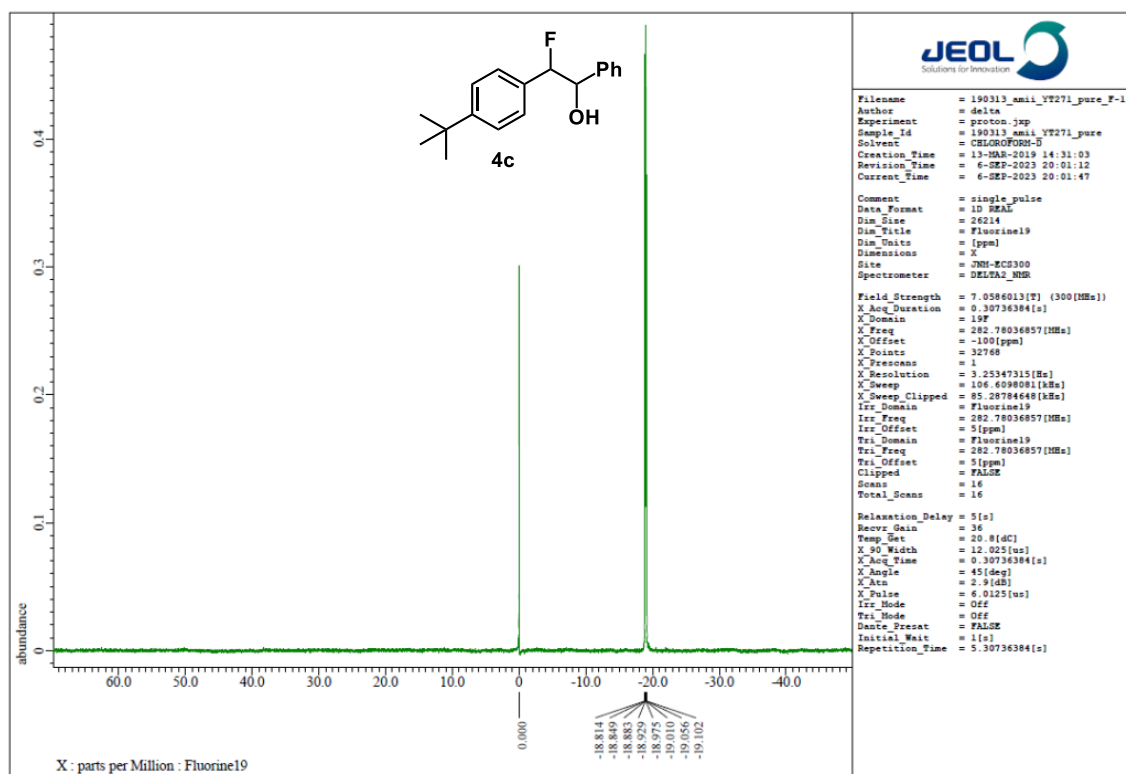

<sup>13</sup>C NMR spectrum of 2-(4-(tert-butyl)phenyl)-2-fluoro-1-phenylethan-1-ol (**4c**)

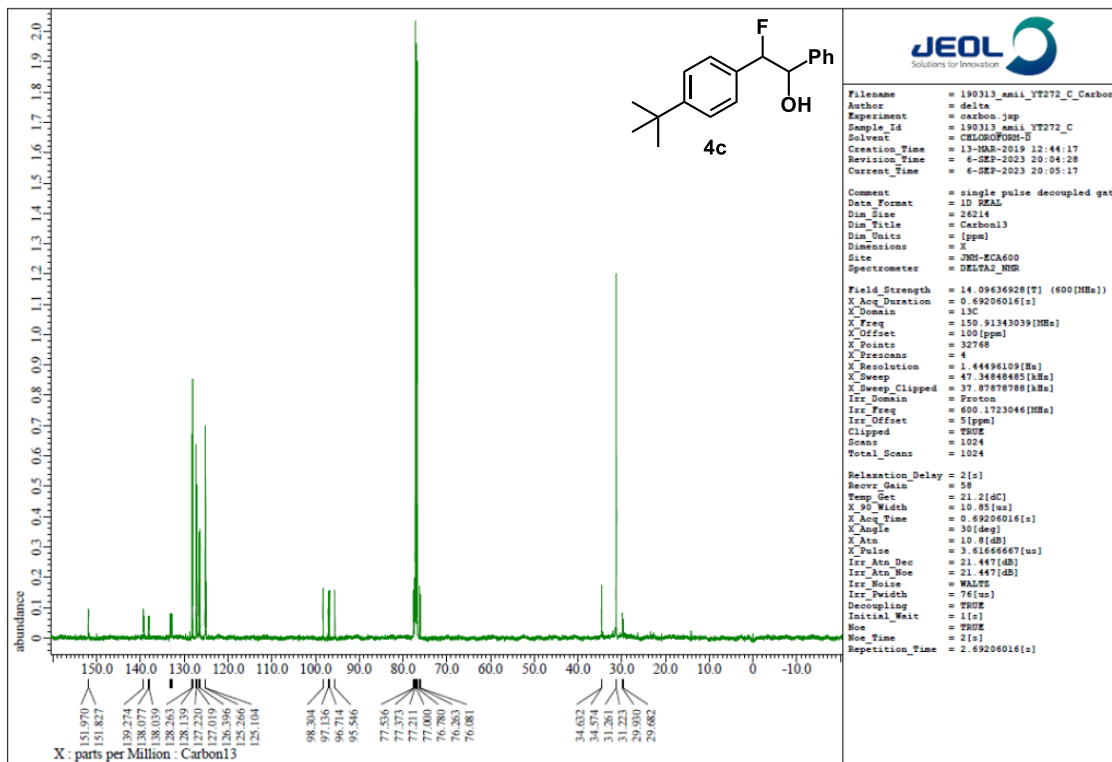

<sup>1</sup>H NMR spectrum of 3-(4-Biphenyl)-3-fluoro-2-phenylpropan-2-ol (**4d**)

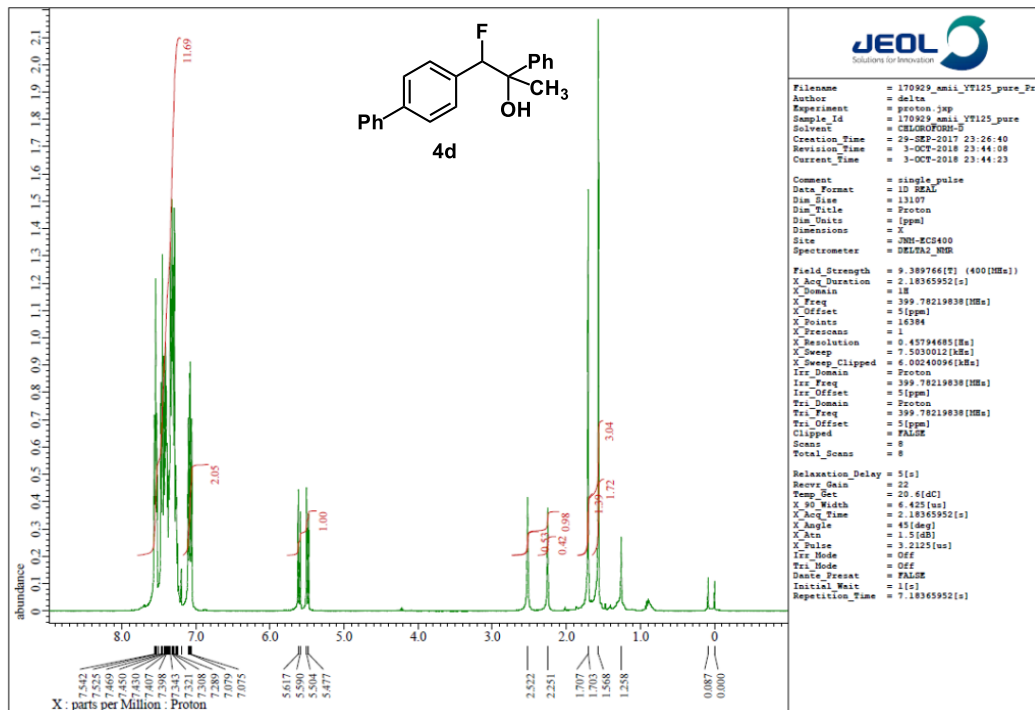

<sup>19</sup>F NMR spectrum of 3-(4-Biphenyl)-3-fluoro-2-phenylpropan-2-ol (**4d**)

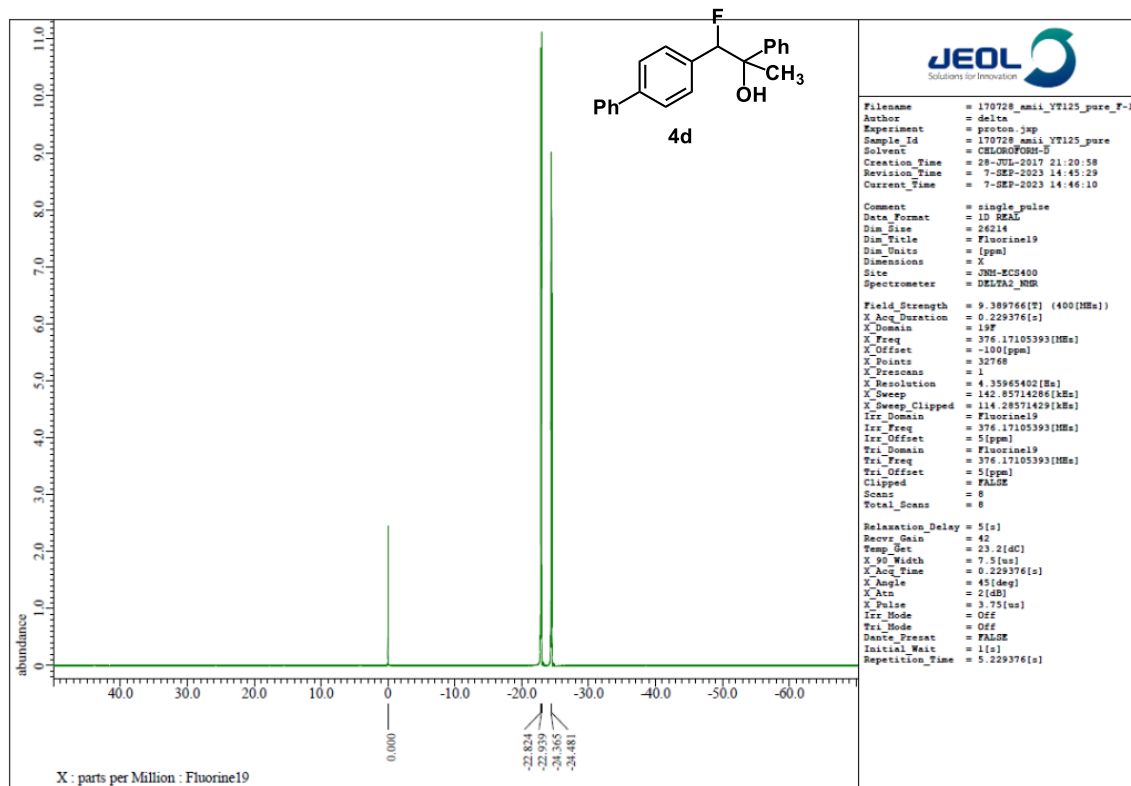

<sup>13</sup>C NMR spectrum of 3-(4-Biphenyl)-3-fluoro-2-phenylpropan-2-ol (**4d**)

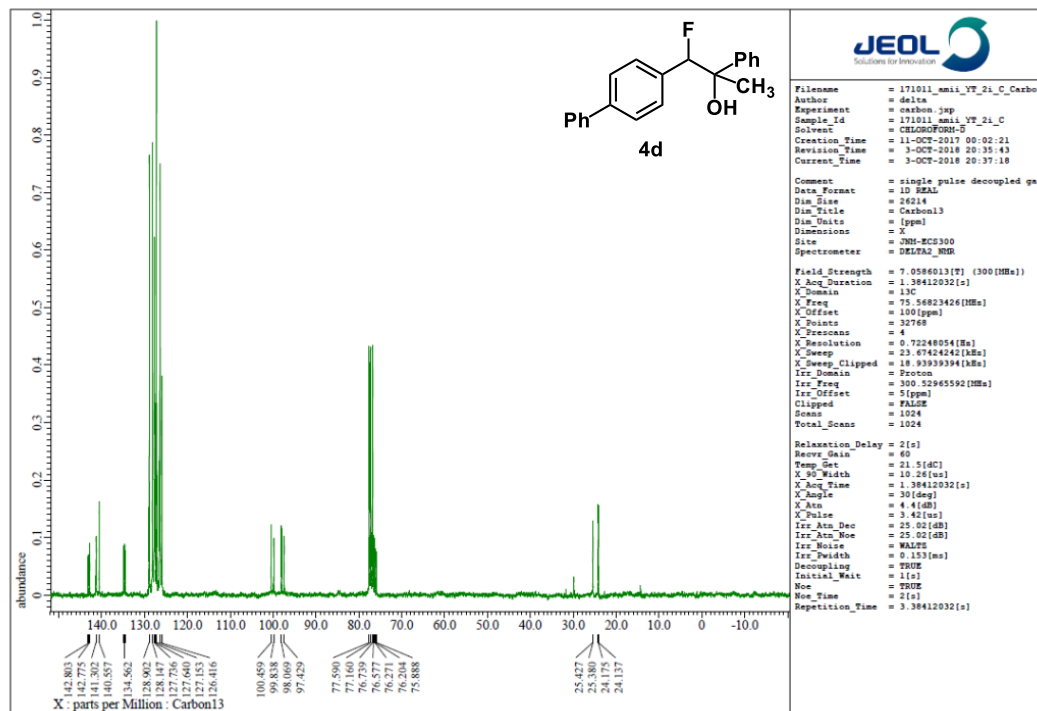

## Appendix

The starting materials (benzyl fluorides) **1** were prepared by the conventional nucleophilic fluorination of the corresponding bromides with CsF.

CAS Registry No.

**1a** (*p*-Ph-C<sub>6</sub>H<sub>4</sub>-CH<sub>2</sub>-F): 848348-07-2

**1b** (*p*-Cl-C<sub>6</sub>H<sub>4</sub>-CH<sub>2</sub>-F): 352-12-5

**1c** (*p*-Br-C<sub>6</sub>H<sub>4</sub>-CH<sub>2</sub>-F): 459-49-4

**1d** (*p*-(*t*-Bu)-C<sub>6</sub>H<sub>4</sub>-CH<sub>2</sub>-F): 329-13-5

**1e** (*m*-Cl-C<sub>6</sub>H<sub>4</sub>-CH<sub>2</sub>-F): 350-52-7

**2a**: 1487496-30-9

**2b**: 2114389-58-9

**2d**: 2121931-01-7

**2e**: 1487496-35-4

**2f**: 159298-87-0
